1 **Title:**

2 **Biallelic variation in the choline and ethanolamine transporter *FLVCR1* underlies a**  
3 **pleiotropic disease spectrum from adult neurodegeneration to severe developmental**  
4 **disorders**

5  
6 **Authors:**

7 Daniel G. Calame<sup>1,2,3#\*</sup>; Jovi Huixin Wong<sup>4#</sup>; Puravi Panda<sup>4</sup>; Dat Tuan Nguyen<sup>4</sup>; Nancy C.P.  
8 Leong<sup>4</sup>; Riccardo Sangermano<sup>5</sup>; Sohil G. Patankar<sup>5</sup>; Mohamed Abdel-Hamid<sup>6</sup>; Lama AlAbdi<sup>7,8</sup>;  
9 Sylvia Safwat<sup>9</sup>; Kyle P. Flannery<sup>10</sup>; Zain Dardas<sup>3</sup>; Jawid M. Fatih<sup>3</sup>; Chaya Murali<sup>3</sup>; Varun  
10 Kannan<sup>1</sup>; Timothy E. Lotze<sup>1</sup>; Isabella Herman<sup>1,2,3,11</sup>; Farah Ammouri<sup>11,12</sup>; Brianna Rezich<sup>13</sup>;  
11 Stephanie Efthymiou<sup>14</sup>; Shahryar Alavi<sup>14</sup>; David Murphy<sup>15</sup>; Zahra Firoozfar<sup>16</sup>; Mahya Ebrahimi  
12 Nasab<sup>17,18</sup>; Amir Bahreini<sup>19,20</sup>; Majid Ghasemi<sup>21</sup>; Nourelhoda A. Haridy<sup>22</sup>; Hamid Reza  
13 Goldouzi<sup>23</sup>; Fatemeh Eghbal<sup>24</sup>; Ehsan Ghayoor Karimiani<sup>25</sup>; Varunvenkat M. Srinivasan<sup>26</sup>;  
14 Vykuntaraju K. Gowda<sup>26</sup>; Haowei Du<sup>3</sup>; Shalini N. Jhangiani<sup>27</sup>; Zeynep Coban-Akdemir<sup>3,28</sup>; Dana  
15 Marafi<sup>3,29</sup>; Lance Rodan<sup>30,31</sup>; Sedat Isikay<sup>32</sup>; Jill A. Rosenfeld<sup>3,33</sup>; Subhadra Ramanathan<sup>34</sup>;  
16 Michael Staton<sup>34</sup>; Kerby C. Oberg<sup>35</sup>; Robin D. Clark<sup>34</sup>; Catharina Wenman<sup>36</sup>; Sam Loughlin<sup>36</sup>;  
17 Ramy Saad<sup>37</sup>; Tazeen Ashraf<sup>37</sup>; Alison Male<sup>37</sup>; Shereen Tadros<sup>37</sup>; Reza Boostani<sup>38</sup>; Ghada M.H.  
18 Abdel-Salam<sup>39</sup>; Maha Zaki<sup>39</sup>; Ebtessam Abdalla<sup>9</sup>; M. Chiara Manzini<sup>10</sup>; Davut Pehlivan<sup>1,2,3</sup>;  
19 Jennifer E. Posey<sup>3</sup>; Richard A. Gibbs<sup>3,27</sup>; Henry Houlden<sup>14</sup>; Fowzan S. Alkuraya<sup>40,41</sup>; Kinga  
20 Bujakowska<sup>5</sup>; Reza Maroofian<sup>14</sup>; James R. Lupski<sup>2,3,27,42\*</sup>; Long Nam Nguyen<sup>4,43-46\*</sup>

21

22 **Author Affiliations:**

- 23 1. Section of Pediatric Neurology and Developmental Neuroscience, Department of  
24 Pediatrics, Baylor College of Medicine, Houston, TX, USA  
25 2. Texas Children's Hospital, Houston, TX, USA  
26 3. Department of Molecular and Human Genetics, Baylor College of Medicine,  
27 Houston, TX, USA

- 28 4. Department of Biochemistry, Yong Loo Lin School of Medicine, National University of  
29 Singapore, Singapore 119228.
- 30 5. Ocular Genomics Institute, Department of Ophthalmology, Massachusetts Eye and Ear,  
31 Harvard Medical School, Boston, MA
- 32 6. Medical Molecular Genetics Department, Human Genetics and Genome Research  
33 Institute, National Research Centre, Cairo, Egypt.
- 34 7. Department of Zoology, College of Science, King Saud University, Riyadh, Saudi Arabia
- 35 8. Department of Translational Genomics, Center for Genomic Medicine, King Faisal  
36 Specialist Hospital and Research Center, Riyadh, Saudi Arabia
- 37 9. Department of Genetics, Medical Research Institute, Alexandria University, Alexandria,  
38 Egypt
- 39 10. Department of Neuroscience and Cell Biology, Rutgers-Robert Wood Johnson Medical  
40 School, Child Health Institute of New Jersey, NY, USA
- 41 11. Boys Town National Research Hospital, Boys Town, NE, USA
- 42 12. The University of Kansas Health System, Westwood, KS, USA
- 43 13. Munroe-Meyer Institute for Genetics and Rehabilitation, University of Nebraska Medical  
44 Center, Omaha, NE, USA
- 45 14. Department of Neuromuscular diseases, UCL Institute of Neurology, WC1N 3BG,  
46 London, UK
- 47 15. Department of Clinical and Movement Neurosciences, UCL Queen Square Institute of  
48 Neurology, University College London, United Kingdom
- 49 16. Palindrome, Isfahan, Iran
- 50 17. Meybod Genetic Research Center, Yazd, Iran
- 51 18. Yazd Welfare Organization, Yazd, Iran
- 52 19. KaryoGen, Isfahan, Iran
- 53 20. Department of Human Genetics, University of Pittsburgh, PA, USA
- 54 21. Department of Neurology, Isfahan University of Medical Sciences, Isfahan, Iran
- 55 22. Department of Neurology, Faculty of Medicine, Assiut University, Assiut, Egypt
- 56 23. Department of Pediatrics, Faculty of Medicine, Mashhad University of Medical Sciences,  
57 Mashhad, Iran
- 58 24. Department of Medical Genetics, Next Generation Genetic Polyclinic, Mashhad, Iran.
- 59 25. Molecular and Clinical Sciences Institute, St. George's, University of London, Cranmer  
60 Terrace London, London, UK.
- 61 26. Department of Pediatric Neurology, Indira Gandhi Institute of Child Health, Bangalore,  
62 India
- 63 27. Human Genome Sequencing Center, Baylor College of Medicine, Houston, TX, USA
- 64 28. Human Genetics Center, Department of Epidemiology, Human Genetics, and  
65 Environmental Sciences, School of Public Health, The University of Texas Health  
66 Science Center at Houston, Houston, TX, USA
- 67 29. Department of Pediatrics, Faculty of Medicine, Kuwait University, Kuwait
- 68 30. Department of Neurology, Boston Children's Hospital, Boston, Massachusetts, USA
- 69 31. Division of Genetics and Genomics, Boston Children's Hospital, Boston, Massachusetts,  
70 USA
- 71 32. Gaziantep Islam Science and Technology University, Medical Faculty, Department of  
72 Pediatric Neurology, Gaziantep, Turkey
- 73 33. Baylor Genetics Laboratories, Houston, TX, USA
- 74 34. Division of Genetics, Department of Pediatrics, Loma Linda University School of  
75 Medicine, Loma Linda, CA, USA

- 76 35. Department of Pathology and Human Anatomy, Loma Linda University School of  
77 Medicine, Loma Linda, CA, USA  
78 36. Rare & Inherited Disease Laboratory, NHS North Thames Genomic Laboratory Hub,  
79 Great Ormond Street Hospital for Children NHS Foundation Trust, London, WC1N 3BH,  
80 UK  
81 37. North East Thames Regional Genetic Service, Great Ormond Street Hospital for  
82 Children NHS Foundation Trust, London, UK  
83 38. Department of Neurology, Mashhad University of Medical Sciences, Mashhad, Iran  
84 39. Department of Clinical Genetics, Human Genetics and Genome Research Division,  
85 National Research Centre, Cairo, Egypt.  
86 40. Department of Translational Genomics, Center for Genomic Medicine, King Faisal  
87 Specialist Hospital and Research Center, Riyadh, Saudi Arabia  
88 41. Department of Pediatrics, Prince Sultan Military Medical City, Riyadh, Saudi Arabia  
89 42. Department of Pediatrics, Baylor College of Medicine, Houston, TX, USA  
90 43. Immunology Program, Life Sciences Institute, National University of Singapore,  
91 Singapore 117456.  
92 44. Singapore Lipidomics Incubator (SLING), Life Sciences Institute, National University of  
93 Singapore, Singapore 117456.  
94 45. Cardiovascular Disease Research (CVD) Programme, Yong Loo Lin School of Medicine,  
95 National University of Singapore, Singapore 117545.  
96 46. Immunology Translational Research Program, Yong Loo Lin School of Medicine,  
97 National University of Singapore, Singapore 117456.

98 # - these authors contributed equally.

99  
100 \* Corresponding authors: D.G.C. ([Daniel.calame@bcm.edu](mailto:Daniel.calame@bcm.edu)); J.R.L. ([jlupski@bcm.edu](mailto:jlupski@bcm.edu)), L.N.  
101 ([bchnnl@nus.edu.sg](mailto:bchnnl@nus.edu.sg))

102 Running Title: *FLVCR1*-related severe neurodevelopmental disorders

103

104 **Keywords:**

105 *FLVCR1*; choline; ethanolamine; neurodevelopmental disorders; neurodegeneration; multiple  
106 congenital anomalies; Diamond-Blackfan anemia

107

108

109

110

111

112

113

114 **Abstract:**

115 *FLVCR1* encodes Feline leukemia virus subgroup C receptor 1 (FLVCR1), a solute  
116 carrier (SLC) transporter within the Major Facilitator Superfamily. FLVCR1 is a widely expressed  
117 transmembrane protein with plasma membrane and mitochondrial isoforms implicated in heme,  
118 choline, and ethanolamine transport. While *Flvcr1* knockout mice die *in utero* with skeletal  
119 malformations and defective erythropoiesis reminiscent of Diamond-Blackfan anemia, rare  
120 biallelic pathogenic *FLVCR1* variants are linked to childhood or adult-onset neurodegeneration  
121 of the retina, spinal cord, and peripheral nervous system.

122 We ascertained from research and clinical exome sequencing 27 individuals from 20  
123 unrelated families with biallelic ultra-rare missense and predicted loss-of-function (pLoF)  
124 *FLVCR1* variant alleles. We characterize an expansive *FLVCR1* phenotypic spectrum ranging  
125 from adult-onset retinitis pigmentosa to severe developmental disorders with microcephaly,  
126 reduced brain volume, epilepsy, spasticity, and premature death. The most severely affected  
127 individuals, including three individuals with homozygous pLoF variants, share traits with *Flvcr1*  
128 knockout mice and Diamond-Blackfan anemia including macrocytic anemia and congenital  
129 skeletal malformations. Pathogenic *FLVCR1* missense variants primarily lie within  
130 transmembrane domains and reduce choline and ethanolamine transport activity compared with  
131 wild-type *FLVCR1* with minimal impact on FLVCR1 stability or subcellular localization. Several  
132 variants disrupt splicing in a mini-gene assay which may contribute to genotype-phenotype  
133 correlations. Taken together, these data support an allele-specific gene dosage model in which  
134 phenotypic severity reflects residual FLVCR1 activity. This study expands our understanding of  
135 Mendelian disorders of choline and ethanolamine transport and demonstrates the importance of  
136 choline and ethanolamine in neurodevelopment and neuronal homeostasis.

137

138

139 **Text:**

140 Solute transport across lipid bilayers is critical for biological homeostasis and requires  
141 specialized transmembrane proteins<sup>1</sup>. The largest group of membrane transport proteins is the  
142 solute carrier (SLC) superfamily. The superfamily consists of 458 genes divided into 65  
143 families<sup>1</sup>. SLC proteins transport a vast assortment of solutes including amino acids, sugars,  
144 ions, nucleotides, vitamins, and neurotransmitters. Genetic variation in SLC genes influences  
145 common diseases, metabolic traits, and an expanding spectrum of Mendelian disorders<sup>2-4</sup>. As  
146 solute transport disorders are responsive to solute supplementation, dietary interventions, and  
147 gene therapies in preclinical models and humans, they are attractive therapeutic targets<sup>5-7</sup>. Yet,  
148 the function of most SLC genes in human biology remains poorly characterized.

149 One SLC family member associated with Mendelian neurodegenerative disorders is  
150 *FLVCR1* (also known as *SLC49A1* and *MFSD7B*). First recognized as the receptor for Feline  
151 Leukemia Virus Subgroup C (FeLV-C), a retrovirus which causes aplastic anemia in cats<sup>8</sup>,  
152 *FLVCR1* is highly conserved and encodes two isoforms in humans: a full-length 555 amino acid  
153 (aa) plasma membrane isoform FLVCR1a and a small mitochondrial membrane isoform  
154 FLVCR1b (aa 277-555)<sup>9</sup>. FLVCR1 was initially described as a heme exporter in erythroid cells  
155 and other cell lineages<sup>10</sup>. An essential requirement for FLVCR1 was subsequently demonstrated  
156 through knockout of the mouse ortholog *Flvcr1*<sup>11</sup>. Germline knockout of *Flvcr1* results in  
157 embryonic lethality, absent erythropoiesis, craniofacial and limb malformations, and hepatic iron  
158 accumulation, whereas neonatal deletion causes severe macrocytic anemia<sup>11</sup>. Both FLVCR1  
159 isoforms are required for murine viability; mice retaining FLVCR1b but lacking FLVCR1a have  
160 normal erythropoiesis but develop hemorrhages, edema, and skeletal malformations<sup>9</sup>. The  
161 physiologic significance of FLVCR1 heme transport has been called in question especially  
162 considering recent evidence that FLVCR1 is a choline and ethanolamine transporter<sup>4,12-16</sup>.

163           The severe anemia and craniofacial, limb and digital malformations in *Flvcr1* knockout  
164 mice resemble humans with Diamond-Blackfan anemia (DBA) [MIM: 105650]<sup>11,17</sup>. A further link  
165 between *FLVCR1* and DBA was suggested by the observation that *FLVCR1* splicing is  
166 dysregulated in erythroid cells from patients with DBA<sup>18</sup>. However, biallelic variation in *FLVCR1*  
167 has not been identified in individuals with DBA, and DBA is now recognized as primarily a  
168 disorder of ribosome biogenesis<sup>17</sup>. Instead, biallelic pathogenic variation in *FLVCR1* causes rare  
169 recessive neurodegenerative disorders of the retina, spinal cord, and peripheral nerves:  
170 posterior column ataxia with retinitis pigmentosa (PCARP) [MIM: 609033], isolated retinitis  
171 pigmentosa (RP), and hereditary sensory and autonomic neuropathy (HSAN)<sup>19–21</sup>. *FLVCR1*-  
172 related neurodegenerative disorders can manifest from childhood into adulthood. To date, at  
173 least 39 individuals from 22 families have been identified with *FLVCR1*-related  
174 neurodegeneration; most have biallelic *FLVCR1* missense variants, and predicted loss-of-  
175 function variants have only been identified *in trans* with missense variants (**Supplemental**  
176 **Table S1**). Despite the severe multi-organ consequences of *Flvcr1* knockout in mice, extra-  
177 neurological findings or severe developmental disorders have only been described in one  
178 individual with biallelic *FLVCR1* variants, a compound heterozygote (c.574T>C p.Cys192Arg;  
179 c.610del p.Met204Cysfs\*56) with severe developmental disabilities, chronic macrocytic anemia,  
180 liver disease, self-mutilation, and sensory neuropathy<sup>21</sup>. The precise reason(s) for the apparent  
181 discrepancies between human and mouse *FLVCR1*-related phenotypes remains unclear but  
182 could suggest that *FLVCR1* knockout is incompatible with human life.

183           The index case who initiated this study is a male child with severe developmental delay,  
184 epileptic encephalopathy, and microcephaly (Individual 1, **Fig. 1**, **Fig. 2A-E**, **Table 1**). He was  
185 born to non-consanguineous parents from a country in South Asia. He had a history of infantile  
186 spasms, self-mutilation, osteomyelitis, and absent sensory nerve responses on nerve  
187 conduction studies. Brain magnetic resonance imaging (MRI) showed corpus callosum thinning,

188 brainstem and pontine thinning, prominent extra-axial fluid spaces, and reduced white matter  
189 volume (**Fig. 2A-E**). Uric acid and purine levels, measured to assess for Lesch-Nyhan  
190 syndrome [MIM: 300322] due to the history of severe self-injury, were normal. Clinical trio  
191 exome sequencing (cES) did not identify any variants in *HPRT1* nor pathogenic variants in  
192 known disease genes. Hence, these cES data underwent research reanalysis through the  
193 Baylor College of Medicine Genomics Research Elucidates the Genetics of Rare diseases  
194 (BCM-GREGoR) which prioritized the homozygous *FLVCR1* missense variant c.1390G>A  
195 p.G464S given the overlap between the patient's known sensory neuropathy and known  
196 *FLVCR1*-related disorders.

197         To comprehensively characterize the phenotypic spectrum of *FLVCR1*-related disorders  
198 in humans, we reanalyzed ES and genome sequencing (GS) data from the 29,766 individuals  
199 within the BCM-GREGoR and Baylor Genetics clinical diagnostic databases<sup>22</sup>, utilized the online  
200 matchmaking program GeneMatcher<sup>23,24</sup>, and searched other research and diagnostic lab  
201 datasets. We identified 27 individuals from 20 unrelated families with neurological disorders and  
202 biallelic *FLVCR1* variants (**Fig. 1, Table 1**). A pedigree was not available for Individual 27, an  
203 elderly woman with isolated retinitis pigmentosa and dystonia. Unlike prior reports describing  
204 biallelic *FLVCR1* variants in children or adults with neurodegenerative disorders, Individuals 1-  
205 17 had severe developmental disorders. Notably, three individuals with severe developmental  
206 disorders had homozygous *FLVCR1* pLoF variants (Individuals 4, 15, and 17). Individuals 18-27  
207 had childhood or adult-onset neurodegenerative disorders including PCARP, hereditary spastic  
208 paraplegia, and RP (**Table 1**). Most families (14/20) are consanguineous by clinical history. In  
209 Families 1 and 7, the same homozygous missense variant c.1390G>A p.G464S was identified.  
210 Both families originate in the same country in South Asia and are unrelated. Neither family are  
211 consanguineous by clinical history. Absence-of-heterozygosity (AOH), a surrogate measure  
212 from ES data for runs-of-homozygosity (ROH), was calculated for Family 1; total autosomal

213 AOH was 150.1 Mb, and the variant was surrounded by a 4.9 Mb AOH block (**Supplemental**  
214 **Fig. 1**)<sup>25</sup>. These data suggest *FLVCR1*: c.1390G>A p.G464S may represent a South Asian  
215 founder allele. Compound heterozygous variants were identified in the three non-  
216 consanguineous families and segregated according to Mendelian expectations within Family 8.  
217 All clinical and research data were acquired in accordance with ethical standards upon informed  
218 consent and with the approval of the collaborative institutional review boards (**Supplemental**  
219 **Methods**).

220 The phenotypic features of the 27 individuals are summarized in **Table 1, Fig. 2, and**  
221 **Supplemental Table 1**. Individuals 1-17 exhibited severe developmental delay: all were non-  
222 verbal and achieved no developmental motor milestones. All were microcephalic (median Z-  
223 score -4.45, range -2.5 to -10.5) and had reduced brain volume on brain magnetic resonance  
224 imaging (MRI). Individual 16 was microcephalic at birth (29 cm, Z-score -3.9) but was  
225 normocephalic at 3 years old (50.2 cm, Z-score +1.05). Brain MRI findings varied considerably.  
226 Some individuals had only a mild reduction in white matter volume, corpus callosum thinning,  
227 and/or pontine and brainstem thinning (**Fig. 2E**). Others had a severe reduction in brain volume  
228 with simplified gyral pattern (**Fig. 2H, J, K**). In Family 8, cystic encephalomalacia was seen in all  
229 three affected siblings (**Fig. 2O-R**); cystic encephalomalacia was detected on fetal MRI  
230 suggesting a very early developmental defect. Individuals 16 and 17 had only a thin rim of  
231 cerebral cortex reminiscent of hydrancephaly. Another recurring MRI finding observed in  
232 Individuals 1 and 3 was T2 hyperintensity of the posterior columns on spine MRI as previously  
233 reported in PCARP (**Fig. 2L**). Premature death before adulthood was common (14/17).  
234 Hypotonia and epilepsy were nearly universal in individuals who survived the neonatal period.  
235 Other common traits include cortical visual impairment, optic disk atrophy, and spasticity.  
236 Features previously associated with *FLVCR1* including RP and sensory neuropathy were  
237 observed but uncommon; this could represent age-dependent penetrance due to the young age



238 of the cohort or under-ascertainment. Individuals 1 and 8 with the homozygous p.G464S variant  
239 had a history of self-mutilation, osteomyelitis, and sensory neuropathy; congenital insensitivity to  
240 pain was reported in Individual 3, but nerve conduction studies were not performed. Individual  
241 16 also engaged in self-injurious behavior including tongue and lip biting.

242 The most profoundly affected individuals exhibited considerable phenotypic overlap with  
243 *Flvcr1* knockout mice. Individuals 9-11 in Family 8 were stillborn and exhibited craniofacial, limb,  
244 and digital malformations; they were recently identified in a large cohort that investigated the  
245 utility of long-read whole genome sequencing<sup>26</sup> (**Fig. 2X-g, Supplemental Data**). Individual 17  
246 from Family 12 died on in the neonatal period. Fetal MRI and autopsy demonstrated  
247 craniofacial, limb, and digital malformations in addition to congenital heart disease, renal  
248 agenesis, hepatosplenomegaly, and paper-thin cerebral cortex with hydrocephalus and multiple  
249 hemorrhages (**Fig. 2X-d, Supplemental Data**). Bone marrow hematopoiesis was normal.  
250 Hepatomegaly and milder digital malformations including polydactyly and arthrogyrosis were  
251 also observed in other individuals with *FLVCR1*-associated severe developmental disorders.  
252 Unexplained macrocytic anemia was present in 5 of 12 individuals who survived the neonatal  
253 period and for whom red blood cell studies were performed. Reduced fetal movements were  
254 reported in Families 8 and 11.

255 Families 13-20 had mild *FLVCR1*-related diseases including typical phenotypes  
256 (PCARP, HSAN, RP) as well as developmental delay and the novel phenotype hereditary  
257 spastic paraplegia. While spasticity is a common feature of severe *FLVCR1*-related  
258 developmental disorders, it is uncommon in mild *FLVCR1*-related disease<sup>27</sup>. Two recurrent  
259 variants, p.Y128N and p.I343T, were observed in unrelated Persian families. Brain MRI was not  
260 performed in most instances of mild *FLVCR1*-related disease but was normal in individual 20  
261 with *FLVCR1*-related sensory neuropathy, RP, and mild intellectual disability. The two siblings in  
262 Family 17 were evaluated for developmental delay, microcephaly, hypotonia, and hyporreflexia.

263 There was intrafamilial variability with the younger brother exhibiting more developmental  
264 impairment than the older brother (**Supplemental Fig. 2**). In Family 18, the young adult  
265 asymptomatic sister of Individual 25 was also homozygous for *FLVCR1*: c.502C>G p.L168V; as  
266 age of onset as late as the third or fourth decade of life has been described, this likely  
267 represents age-related penetrance<sup>28</sup>.

268 Twenty *FLVCR1* variants were identified within the cohort; only two,  
269 c.1593+5\_1593+8del and c.574T>C p.C192R were previously reported (**Table 2**)<sup>19,29</sup>.  
270 *FLVCR1*(NM\_014053.4) consists of 10 exons and encodes a protein with 12 transmembrane  
271 domains. We visualize the distribution of reported pathogenic *FLVCR1* variants within the  
272 *FLVCR1*(NM\_014053.4) cDNA and protein (**Fig. 3A,B**). All pathogenic *FLVCR1* variants are  
273 rare and absent in the homozygous state in gnomAD v2.1.1<sup>30</sup>. Most are predicted damaging by  
274 multiple pathogenicity predictors and affect conserved residues (**Table 2, Supplemental Table**  
275 **1**). Amino acid substitutions within *FLVCR1* transmembrane domains are predicted damaging  
276 by the protein language model ESM1b<sup>31</sup>, and nearly all pathogenic *FLVCR1* missense variants  
277 fall within well-conserved transmembrane domains (**Fig. 3B; Supplemental Fig. 4**). All *FLVCR1*  
278 nonsense and frameshift variants are predicted to trigger nonsense-mediated decay (NMD)<sup>32</sup>.  
279 To assess the impact of c.884-3C>G on splicing, whole blood RNA was isolated from the carrier  
280 mother of Individual 16, and reverse transcriptase polymerase chain reaction (RT-PCR) was  
281 performed. RT-PCR produced two bands: a larger band seen in controls and a smaller band  
282 absent in controls (**Supplemental Fig. 4**). Sanger sequencing confirmed that the larger band  
283 represented wild-type *FLVCR1*, whereas the smaller band represented a heterozygous deletion  
284 of exon 3 (r.884\_1024del, p.A295\_Y341del). The deletion spans portions of transmembrane  
285 domains 6 and 7 and completely removes the fourth cytoplasmic loop (**Fig. 3B**). The splicing  
286 variant c.1593+5\_1593+8del is strongly predicted to alter splicing by SpliceAI (donor loss  $\Delta$   
287 score 0.97) and Pangolin (splice loss  $\Delta$  score 0.88). A mini-gene splicing assay confirmed this

288 variant causes exon 9 skipping which is predicted to result in protein truncation  
289 (r.1526\_1593del; p.A509Dfs\*4) (**Supplemental Fig. 5 & 9**).

290 Pathogenic missense variants are anticipated to disrupt gene function and involve more  
291 highly conserved functional regions than benign missense variants within the human population  
292 and non-human primates. We therefore compared pathogenicity predictions and conservation  
293 metrics between *FLVCR1* missense variants identified in individuals with *FLVCR1*-related  
294 disorders and *FLVCR1* missense variants present in human and primate populations in  
295 gnomAD v2.1.1 and primAD v1.0 (**Fig. 3C**)<sup>30,33</sup>. CADD, REVEL, MetaRNN, phyloP100way, and  
296 GERP scores were all significantly greater in cases than controls. In contrast, there was no  
297 difference in CADD, REVEL, or GERP scores between missense variants identified in mild  
298 versus severe *FLVCR1*-related disorders (**Fig. 3D**). Comparison of the distribution of severe  
299 versus mild disease-associated missense variants demonstrated that severe disease-  
300 associated missense variants form a cluster within transmembrane domains 9-11 (5 of 8 severe  
301 disease-associated variants vs. 0 of 15 mild disease-associated variants). Similarly, 87.5% of  
302 severe disease-associated missense variants (7/8) lie within both the plasma membrane  
303 isoform *FLVCR1a* and the mitochondrial isoform *FLVCR1b*, whereas only 53.3% of mild  
304 disease-associated missense variants (8/15) fell within both isoforms.

305 To investigate the molecular consequence of *FLVCR1* missense variants on gene  
306 function, we generated missense variants using site-directed mutagenesis of human *FLVCR1*  
307 cDNA and examined each variant's choline and ethanolamine transport activity (**Fig. 4**)<sup>14</sup>.  
308 Briefly, human *FLVCR1* cDNA was co-transfected into HEK293 cells along with human choline  
309 kinase A (*CHKA*) or ethanolamine kinase 1 (*ETNK1*) cDNA because the sole expression of  
310 *FLVCR1* cDNA only slightly increased choline or ethanolamine transport activity. HEK293 cells  
311 were then incubated with [<sup>3</sup>H] choline or [<sup>14</sup>C] ethanolamine, washed, and cellular radioactivity  
312 levels were measured. *CHKA* catalyzes choline phosphorylation into phosphocholine while

313 ETNK1 catalyzes ethanolamine into phosphatidylethanolamine; their co-expression along with  
314 FLVCR1 greatly increases choline or ethanolamine import<sup>14</sup>. In addition to the FLVCR1  
315 missense variants identified in this publication, we also examined p.Q124L and p.G219C, two  
316 FLVCR1 variants recently identified in an individual with HSN<sup>19,34</sup>. These assays demonstrated  
317 nearly all FLVCR1 missense variants significantly reduced choline and ethanolamine transport  
318 activity relative to wild-type FLVCR1 with transport activity ranging from 0% to 55.38% (choline)  
319 and 0% to 48.80%. The transport activity of two variants, p.M151V and p.D421N, was  
320 comparable to wild-type FLVCR1. The p.M151V variant occurred in the homozygous state in an  
321 individual within the BCM-GREGoR database. This individual had a blended developmental  
322 disorder phenotype resulting from multi-locus pathogenic variation in three genes: *AP4B1*,  
323 *AMPD2*, and *NOTCH2*<sup>35</sup>. As the individual's phenotype is explained by other gene variants and  
324 the p.M151V variant's transport activity is normal, p.M151V may represent a rare benign  
325 polymorphism. The p.D421N variant was identified in compound heterozygosity with a  
326 nonsense variant in Individual 3. Although p.D421N did not alter choline or ethanolamine  
327 transport activity, the variant is weakly predicted to cause donor loss by SpliceAI (score 0.22). A  
328 mini-gene splicing assay of this variant (c.1261G>A p.D421N) demonstrated a strong effect on  
329 exon 6 skipping (**Supplemental Fig. 5 & 6**). The phenotypic overlap of Individual 3 with other  
330 severe *FLVCR1* cases and the presence of typical *FLVCR1* features including RP and posterior  
331 column T2 hyperintensity supports the variant's pathogenicity. Another missense variant in the  
332 same exon (c.1235G>A p.G412A) also showed a strong effect on exon 6 skipping in addition to  
333 its effect on choline and ethanolamine transport (**Supplemental Fig. 5 & 6**). Western blot  
334 analysis of HEK293 cells overexpressing wild-type and variant FLVCR1 showed similar levels of  
335 FLVCR1 protein indicating that FLVCR1 missense variants do not impact protein stability (**Fig.**  
336 **4**). Immunostaining demonstrates FLVCR1 missense variants localize to the plasma membrane  
337 like wild-type FLVCR1; only p.G412A exhibited abnormal intracellular accumulation (**Fig. 4**). As  
338 we previously characterized the choline transport activity of all *FLVCR1* missense variants

339 reported in the literature<sup>36</sup>, we compared transport activity between mild and severe phenotype-  
340 associated variants but found no significant difference (mean choline transport activity as a  
341 percentage of wild-type *FLVCR1*: mild phenotypes, 34.3±21.9; severe phenotypes, 35.5±21.9;  
342 p=0.9222).

343 Here, we demonstrate rare genetic variation in the choline and ethanolamine transporter  
344 gene *FLVCR1* causes a broad and pleiotropic recessive disease spectrum ranging from adult  
345 neurodegeneration to severe developmental disorders. Choline is an essential nutrient which  
346 plays an integral role in methyl group metabolism, phosphatidylcholine (PC) synthesis via the  
347 Kennedy pathway, and acetylcholine synthesis<sup>37</sup>. While *de novo* choline synthesis occurs in the  
348 liver through the phosphatidylethanolamine *N*-methyltransferase pathway, this pathway is  
349 inadequate to meet the needs of the human organism<sup>37</sup>. Choline is found in animal products,  
350 cruciferous vegetables, and beans<sup>37</sup>. The dietary intake of choline in most individuals in the  
351 United States and Europe falls below the United States Institute of Medicine's adequate intake  
352 level<sup>37,38</sup>. Choline insufficiency is particularly common in low-income countries, and choline is  
353 neglected in nutrient-fortified food aid<sup>39</sup>. Furthermore, individual dietary requirements vary  
354 considerably due to multiple factors including genotype, sex, developmental stage, and dietary  
355 intake of vitamins involved in methyl group metabolism including folate and B12<sup>40</sup>. Single  
356 nucleotide polymorphisms in genes involved in the phosphatidylethanolamine *N*-  
357 methyltransferase pathway, folate and methyl group metabolism, and choline transport including  
358 *PEMT*, *MTHFR*, *MTR*, *MTRR*, and *SLC44A1* have been shown to modulate choline  
359 requirements and risk of choline deficiency<sup>40</sup>. Similarly, ethanolamine cannot be synthesized in  
360 humans and is a precursor for phosphatidylethanolamine (PE) synthesis via the Kennedy  
361 pathway<sup>41</sup>. PE and PC are abundant membrane phospholipids required for membrane integrity,  
362 cell division, and mitochondrial respiratory function.

363 Choline is required for normal neurodevelopment<sup>42</sup>. Maternal choline deficiency impairs  
364 hippocampal development as well as neuronal progenitor cell and retinal progenitor cell  
365 expansion and differentiation in mouse embryos<sup>43,44</sup>. Choline deficiency also causes anemia,  
366 liver disease, growth retardation, and immune deficiency<sup>45-47</sup>. Neurodevelopment is also  
367 disrupted by defective choline uptake<sup>48</sup>. Pathogenic variation in *SLC5A7*, the gene encoding a  
368 high affinity choline transporter expressed in cholinergic neurons, causes two  
369 neurodevelopmental disorders: autosomal recessive (AR) presynaptic congenital myasthenic  
370 syndrome 20 [MIM: 617143] and autosomal dominant (AD) distal hereditary motor  
371 neuronopathy [MIM: 158580]<sup>49,50</sup>. Similarly, pathogenic variation in *SLC44A1*, a gene predicted  
372 to encode the low affinity choline transporter CTL1, causes AR childhood-onset  
373 neurodegeneration with ataxia, tremor, optic atrophy, and cognitive decline [MIM: 618868]<sup>51</sup>.  
374 Finally, the protein encoded by closely related gene *FLVCR2* is expressed at the blood-brain  
375 barrier and transports choline and ethanolamine<sup>16,52</sup>. Pathogenic variation in *FLVCR2* causes  
376 Fowler syndrome, a severe AR disorder characterized by proliferative vasculopathy,  
377 hydranencephaly, fetal akinesia deformation sequence, and prenatal lethality [MIM: 225790]<sup>53</sup>.  
378 The identification of *FLVCR1* as a neurodevelopmental choline and ethanolamine transport  
379 disorder further reinforces the critical role of choline and ethanolamine in brain development.  
380 Additionally, the identification of multiple neurodevelopmental choline and ethanolamine  
381 transport disorders demonstrates considerable complexity to choline and ethanolamine  
382 regulation within the developing brain and warrants further study. Therapeutic choline and  
383 ethanolamine supplementation has not been attempted in patients with choline and  
384 ethanolamine transport disorders but could in theory be efficacious as in riboflavin transporter  
385 deficiency<sup>6</sup>. The existence of multiple choline transporters allows for alternative routes for  
386 choline uptake<sup>1</sup>, and supplementation could potentially boost choline intake through  
387 hypomorphic transporters. Randomized controlled trials of choline supplementation in fetal  
388 alcohol syndrome have shown choline supplementation is well-tolerated and can have beneficial

389 neurocognitive effects<sup>54,55</sup>. Measurement of choline and ethanolamine levels in biospecimens  
390 from individuals with *FLVCR1*-related disorders is needed to inform choline and/or ethanolamine  
391 supplementation as a potential therapeutic modality.

392         Based on these findings, we propose an allele-specific gene dosage model in which  
393 disease severity is a function of residual *FLVCR1* activity. This proposal stems from three key  
394 observations. First, we identified three individuals with severe developmental disorders and  
395 homozygous *FLVCR1* pLoF variants. These individuals are thus genetically equivalent to *Flvcr1*  
396 knockout mice and zebrafish, which also exhibit severe developmental phenotypes<sup>11,56</sup>. Biallelic  
397 pLoF *FLVCR1* variants have not been identified in individuals with milder *FLVCR1*-related  
398 phenotypes like PCARP; nearly all reported individuals instead have biallelic missense variants.  
399 Second, we show most pathogenic *FLVCR1* missense variants reduce but do not completely  
400 eliminate choline and ethanolamine transport and thus likely represent hypomorphic alleles<sup>36</sup>.  
401 *Flvcr1* was previously shown to exhibit highest central nervous system expression in the retina  
402 followed by the posterior column of the spinal cord and cerebellum; this may parsimoniously  
403 explain the susceptibility of these tissues to mild hypomorphic alleles<sup>19</sup>. Third, we observe  
404 evidence of complex compound inheritance in which *FLVCR1* variants may contribute to mild  
405 phenotypes in homozygosity but severe phenotypes in compound heterozygosity with a more  
406 severe variant (e.g., *FLVCR1* p.C192R) or severe phenotypes in homozygosity but mild  
407 phenotypes when paired with a less deleterious variant (e.g., *FLVCR1*  
408 c.1593+5\_1593+8del)<sup>19,21,29</sup>. The allele-specific gene dosage model is well-described in  
409 recessive disorders but can confound diagnostic personalized genome analysis when the  
410 clinically reported phenotype diverges substantially from the disease trait clinical synopsis  
411 provided in the literature or online databases like Online Mendelian Inheritance in Man (OMIM).  
412 Indeed, the severely affected individuals reported here had all undergone clinical or research  
413 exome or genome sequencing which identified the reported *FLVCR1* variants, yet in each case

414 the variants were previously felt either non-contributory or of uncertain significance given the  
415 apparent phenotypic mismatch. Such false assumptions illustrate the importance of  
416 incorporating model organism data into personalized genome analysis for rare diseases and the  
417 need to anticipate more severe and milder phenotypes associated with each disease gene locus  
418 to maximize the yield of diagnostic genetic testing.

419 We did not observe a correlation between FLVCR1 missense variant choline transport  
420 activity and phenotypic severity in our functional assay. There are several possible  
421 explanations. First, our choline transport assay may lack the sensitivity to discriminate between  
422 mild and severe phenotype-associated variants. As the transport assay is reliant on  
423 overexpression of *FLVCR1* cDNA, it is insensitive to splicing defects. Indeed, we demonstrate  
424 through mini-gene splicing assays that several *FLVCR1* single nucleotide variants and indels  
425 disrupt splicing (**Supplemental Figures 5-9**). Second, the cellular phenotype assessed by the  
426 choline transport assay must be distinguished from the organismal phenotypes characterized in  
427 humans with pathogenic *FLVCR1* variation. Third, FLVCR1 was found to transport additional  
428 ligands like ethanolamine in both this study and previous studies<sup>14</sup>. While a reduction in both  
429 choline and ethanolamine transport was observed with most variants, some like p.S305R had a  
430 more severe impact on ethanolamine than choline transport. Fourth, as both plasma membrane  
431 and mitochondrial isoforms FLVCR1a and FLVCR1b are required for murine viability<sup>9</sup>, a  
432 missense variant involving both isoforms may have a greater phenotypic impact than one only  
433 impacting the plasma membrane isoform FLVCR1a. In line with this hypothesis, we observed  
434 nearly all severe disease associated *FLVCR1* missense variants are predicted to impact both  
435 isoforms. Another possibility is maternal and/or fetal deficiency of choline, ethanolamine, folate,  
436 and/or B12 due to poor dietary intake or maternal-fetal genotypes could act as phenotypic  
437 modifiers<sup>40</sup>. Finally, it is important to note the phenotypes associated with homozygous first  
438 exon frameshifts in Individuals 4 and 15 were not as severe as those seen in Individual 17 with



439 the homozygous exon 4 nonsense variant nor in individuals 12-14 with the homozygous splice  
440 site variant c.1593+5\_1593+8del. This defines a gene polarity effect<sup>57</sup>. One possible explanation  
441 is first exon pLoF variants may not represent true null alleles. First exon premature termination  
442 codons (PTCs) can escape NMD and generate a functional or partially functional truncated  
443 protein if a downstream methionine allows for in-frame translation re-initiation<sup>58</sup>.

444 In summary, our report reveals a broad and pleiotropic phenotypic spectrum resulting  
445 from biallelic *FLVCR1* variants; these range from adult neurodegeneration to severe  
446 developmental disorders with variable anemia and skeletal malformations. Combined with  
447 recent studies demonstrating *FLVCR1* encodes a choline and ethanolamine transporter<sup>4,13,16,36</sup>,  
448 these data suggest choline and ethanolamine transport into the central and peripheral nervous  
449 systems is essential to prevent neurodegeneration and required for neurodevelopment. The  
450 observation that the most severe *FLVCR1*-related phenotypes cause stillbirth and resemble  
451 Diamond-Blackfan anemia establishes *FLVCR1* should be considered in the differential  
452 diagnosis of recurrent miscarriage, multiple congenital anomalies, and severe Diamond-  
453 Blackfan anemia-like phenotypes. Further studies are required to understand the impact of gene  
454 x environmental (GxE) interactions on *FLVCR1*-related phenotypes and the therapeutic  
455 implications of choline or ethanolamine supplementation in *FLVCR1*-related diseases.

456

#### 457 **Figure Legends:**

458 **Figure 1: Pedigrees of families with *FLVCR1*-related developmental and**  
459 **neurodegenerative disorders.**

460 **Per medrxiv requirements, this figure was removed but is available upon request to the**  
461 **corresponding authors.**

462 Pedigrees of families with *FLVCR1*-related diseases. Genotype is indicated above each  
463 pedigree and below each family member. *A* indicates wild-type *FLVCR1* allele, *a* indicates

464 *FLVCR1* variant allele 1, and *a'* indicates *FLVCR1* variant allele 2; specific variants differ from  
465 one pedigree to the next. Red shading indicates severe *FLVCR1*-related disease (microcephaly,  
466 brain atrophy, severe developmental disabilities), whereas light blue shading indicates relatively  
467 milder neurological *FLVCR1*-related disease (posterior column ataxia with retinitis pigmentosa,  
468 hereditary sensory and autonomic neuropathy, isolated retinitis pigmentosa, or hereditary  
469 spastic paraplegia). Gray shading indicates individuals suspected of possibly having a different  
470 genetic syndrome characterized by neonatal demise, hypotonia, and arthrogryposis.

471  
472 **Figure 2: Phenotypic features of *FLVCR1*-related developmental and neurodegenerative**  
473 **disorders**

474 Photographs and magnetic resonance imaging (MRI) from each family are divided into separate  
475 boxes bordered by thin black lines. **Per medrxiv requirements, patient photographs have**  
476 **been removed but are available upon request to the corresponding authors.**

477 **A-E)** Images of Individual 1 (I-1), Family 1 with homozygous *FLVCR1* p.G464S variant. A-D  
478 show examples of self-mutilation including foot, ear, and arm ulcerations (yellow arrowheads)  
479 and digital amputation (red arrowhead). E shows sagittal T1-weighted brain MRI. Pontine  
480 thinning is indicated with yellow arrow.

481 **F)** Image of Individual 8 (I-8), Family 7 with homozygous *FLVCR1* p.G464S variant. Self-  
482 mutilation and digital amputation of the hand is shown.

483 **G, H)** Images of Individual 2 (I-2), Family 2. G shows patient with triangular facies, microcephaly  
484 and severe developmental delay. H shows axial T2-weighted brain MRI demonstrating severe  
485 reduction in cerebral brain volume and a simplified gyral pattern.

486 **I, J)** Images of Individual 5 (I-5), Family 5. I shows patient with microcephaly, broad nasal  
487 bridge, widely spaced eyes, and severe developmental delay. J shows axial T1-weighted brain  
488 MRI, demonstrating severe reduction in cerebral brain volume and a simplified gyral pattern.

489 **K, L)** Images of Individual 3 (I-3), Family 3. K shows axial T2-weighted brain MRI with severe  
490 reduction in cerebral brain volume. L shows T2-weighted cervical spine MRI demonstrating  
491 posterior column T2 signal hyperintensity (red arrow).

492 **M-R)** Images of Individuals 10 and 11 (I-10 and I-11), Family 8. M and N show individuals 10  
493 and 11. Photographs demonstrating microcephaly, severe developmental delay, broad nasal  
494 bridge, and tracheostomy secondary to respiratory failure. O-R show axial T1-weighted brain  
495 MRI from Individual 11 demonstrating reduction in cerebral brain volume with relative cerebellar  
496 sparing and cystic encephalomalacia (red arrows).

497 **S-U)** Images of Individual 7 (I-7), Family 6. Images show axial T2-weighted brain MRI with  
498 reduction in cerebral brain volume.

499 **V, W)** Images of Individual 16 (I-16), Family 11. V and W show coronal T2-weighted brain MRI  
500 and axial T1-weighted brain MRI respectively demonstrating a severe reduction in brain volume  
501 with hydrocephalus *ex vacuo*.

502 **X-d)** Images of Individual 17 (I-17), Family 12. X shows irregular undulation of the ear lobe. Y  
503 shows the left foot with ankle dislocation and absence of the great toe, 2<sup>nd</sup> toe, and 3<sup>rd</sup> toe. Z  
504 shows the right foot demonstrating cleft foot, absence of the 2<sup>nd</sup> toe, syndactyly of toes 3-4, and  
505 proximal displacement of the great toe. a is a full body radiograph demonstrating ten ribs, long  
506 limbs, absent left tibia (red arrow), and bilateral ectrodactyly of the feet. b-d are fetal T2-  
507 weighted MRI images performed at 28 weeks gestation. b shows hydrocephalus with absence  
508 of midline structures (blue arrow) and hypertrophic kidney with pelviectasis (red arrow). c shows  
509 hydrocephalus with absence of some midline structures (red arrow) and thinning of the cortical

510 mantle (blue arrow). d shows severe hydrocephalus with thinning of the cortical mantle (red  
511 arrow), small cerebellum and brainstem (blue arrow), and left kidney hypertrophy with absence  
512 of the right kidney (yellow arrow).

513 e-g) Images of Individual 13 (I-13), Family 9. Postmortem images of Individual 13 (c-e) show  
514 joint contractures, long tapering fingers. absent right thumb, hypoplastic left thumb,  
515 microcephaly, and cleft lip and palate.

### 516 **Figure 3: Summary of the *FLVCR1* allelic series**

517 **A)** Model of protein-coding portions of human *FLVCR1* cDNA (NM\_014053.4) showing location  
518 of novel and previously published start loss variants, splicing variants, nonsense variants, and  
519 frameshift variant alleles. Start loss and splicing variants are indicated by arrowheads above the  
520 model. Nonsense and frameshift variants are indicated by arrowheads below the model. Red  
521 arrowheads show variants associated with severe phenotypes, whereas light blue shading  
522 indicates the relatively milder neurological disease.

523 **B)** Model of human FLVCR1 protein (Uniprot entry Q9Y5Y0) showing location of novel and  
524 previously published missense variants. Light gray rectangles indicate transmembrane domains,  
525 dark gray rectangles indicate intracellular domains, and dark blue rectangles indicate  
526 extracellular domains. Red ball and sticks indicate severe phenotypes, whereas light blue ball  
527 and sticks indicate mild phenotypes. Portions of FLVCR1 found within the plasma membrane  
528 isoform FLVCR1a and mitochondrial isoform FLVCR1b are indicated below the figure in green  
529 and purple, respectively. Red box indicates region deleted due to c.884-3C>G (r.884\_1024del,  
530 p.A295\_Y341del). ESM1b pathogenicity predictions are shown above the model. Increasing  
531 likelihood of pathogenicity is reflected by the blue (low) to yellow (high) gradient.

532 **C)** Comparison of pathogenicity predictions (CADD, REVEL, MetaRNN) and conservation  
533 metrics (phyloP100way, GERP) between novel and previously reported pathogenic *FLVCR1*

534 variants and all variants within gnomAD v3.1.2 (76,156 human samples, 189 variants) and  
535 primateseq v1.0 (811 primate samples from 236 primate species, 209 variants). \*  $p < 0.05$ ,  
536 unpaired t test with Welch's correction.

537 **D)** Comparison of pathogenicity predictions (CADD, REVEL) and conservation metric (GERP)  
538 between mild and severe *FLVCR1*-related phenotypes. Differences in transmembrane domains  
539 9-11 and isoform clustering of *FLVCR1* variants between mild and severe phenotypes is also  
540 displayed. Gray = variants located outside transmembrane domains 9-11, black = variants  
541 located inside transmembrane domains 9-11, purple = variants located inside mitochondrial  
542 isoform FLVCR1b, green = variants located inside plasma membrane isoform FLVCR1a but not  
543 FLVCR1b. ns = not significant, TM = transmembrane.

544

545 **Figure 4: Pathogenic missense variation in *FLVCR1* reduces choline and ethanolamine**  
546 **transport**

547 **A-B)** Choline transport activity of the *FLVCR1* missense variants expressed as absolute values  
548 (DPM/well) or as percentage of wildtype (WT) *FLVCR1*. These missense variants and WT  
549 human *FLVCR1* (h*FLVCR1*) were co-expressed with choline kinase alpha (CHKA) in HEK293  
550 cells for activity assay with [<sup>3</sup>H] choline. Mock was transfected with CHKA alone. Experiments  
551 were performed at least twice in triplicates. Data are expressed as mean  $\pm$  SD. \*\*\*\* $P < 0.0001$ ;  
552 One-way ANOVA for A-B. ns, not significant.

553 **C-D)** Ethanolamine transport activity of the *FLVCR1* missense variants expressed as absolute  
554 values (DPM/well) or as percentage of WT *FLVCR1*. These missense variants and WT human  
555 *FLVCR1* were co-expressed with ethanolamine kinase 1 (ETNK1) in HEK293 cells for activity  
556 assay with [<sup>14</sup>C] ethanolamine. Mock was transfected with ETNK1 alone. Experiments were

557 performed at least twice in triplicates. Data are expressed as mean  $\pm$  SD. \*\*\*\*P<0.0001; One-  
558 way ANOVA for C-D. ns, not significant.

559 **E)** Western blot analysis of HEK293 cells overexpressed with WT or hFLVCR1 variants. Red  
560 vertical arrowhead marks  $M_r = 59$  kD migration of FLVCR1; GAPDH loading control shown  
561 below.

562 **F)** Immunostaining of WT or hFLVCR1 mutants overexpressed in HEK293 cells. Vertical yellow  
563 horizontal bar shows image scale. Arrows (yellow) show plasma membrane, where membrane  
564 GFP was used as a marker. Arrowheads show intracellular signals of hFLVCR1.

565

#### 566 **Web Resources**

567 Online Mendelian Inheritance in Man, <http://www.omim.org>

568 gnomAD Browser, <https://gnomad.broadinstitute.org/>

569 Baylor College of Medicine Human Genome Sequencing Center, <https://www.hgsc.bcm.edu>

570 Baylor College of Medicine Lupski Lab, <https://github.com/BCM-Lupskilab>

571 CADD, <https://cadd.gs.washington.edu/>

572 SpliceAI and Pangolin, <https://spliceailookup.broadinstitute.org/>

573 primAD Browser, <https://primad.basespace.illumina.com/>

574

#### 575 **Data Availability**

576 All data described in this study are provided within the article and Supplementary Material. Raw  
577 sequencing data and de-identified clinical data are available from the corresponding authors  
578 upon request.

579

#### 580 **Acknowledgements**

581 This study was supported in part by the U.S. National Human Genome Research Institute  
582 (NHGRI) and National Heart Lung and Blood Institute (NHBLI) to the Baylor-Hopkins Center for  
583 Mendelian Genomics (BHCMG, UM1 HG006542, J.R.L.); NHGRI grant as part of the GREGoR  
584 Consortium (U01 HG011758 to J.E.P., J.R.L., and R.A.G.); NHGRI grant to Baylor College of  
585 Medicine Human Genome Sequencing Center (U54HG003273 to R.A.G.); U.S. National  
586 Institute of Neurological Disorders and Stroke (NINDS) (R35NS105078 to J.R.L.); Muscular  
587 Dystrophy Association (MDA) (512848 to J.R.L.); Singapore Ministry of Education grants  
588 (T2EP30221-0012, T2EP30123-0014, and NUHSRO/2022/067/T1 to L.N.N.); and Spastic  
589 Paraplegia Foundation Research Grant to J.R.L. D.P. was supported by a NINDS 1K23  
590 NS125126-01A1 and Rett Syndrome Research Trust fellowship award from International Rett  
591 Syndrome Foundation (IRSF grant #3701-1). D.G.C. was supported by NIH Medical Genetics  
592 Research Fellowship Program (T32 GM007526), the Chao Physician Scientist Award, the Child  
593 Neurologist Career Development Program K12, and MDA Development Grant (873841). K.M.B  
594 was supported by the GREGoR Consortium Research Grant from the GREGoR Data  
595 Coordinating Center (U24HG011746 to KMB); Foundation Fighting Blindness (EGI-GE-1218-  
596 0753-UCSD to KMB), Iraty Award 2023, Lions Foundation, Research to Prevent Blindness, and  
597 NEI: P30EY014104 (MEEI core support).

598

### 599 **Ethics Declaration**

600 This study adheres to the principles in the Declaration of Helsinki. The study was approved by  
601 Baylor College of Medicine Institutional Review Board (IRB) protocol H-29697. Informed  
602 consent including consent to have the results of this research work published was obtained from  
603 all participants as required by the IRB.

604

### 605 **Potential Conflict of Interest**

606 J.R.L. has stock ownership in 23andMe, is a paid consultant for Genome International, and is a  
607 co-inventor on multiple United States and European patents related to molecular diagnostics for  
608 inherited neuropathies, eye diseases, genomic disorders, and bacterial genomic fingerprinting.  
609 The Department of Molecular and Human Genetics at Baylor College of Medicine receives  
610 revenue from clinical genetic testing conducted at Baylor Genetics (BG) Laboratories. Other  
611 authors have no potential conflicts to disclose.

612

613 **References:**

- 614 1. Pizzagalli MD, Bensimon A, Superti-Furga G. A guide to plasma membrane solute carrier  
615 proteins. *FEBS J.* 2021;288(9):2784-2835. doi:10.1111/febs.15531
- 616 2. Marafi D, Fatih JM, Kaiyrzhanov R, et al. Biallelic variants in SLC38A3 encoding a glutamine  
617 transporter cause epileptic encephalopathy. *Brain.* 2022;145(3):909-924.  
618 doi:10.1093/brain/awab369
- 619 3. Saida K, Maroofian R, Sengoku T, et al. Brain monoamine vesicular transport disease  
620 caused by homozygous SLC18A2 variants: A study in 42 affected individuals. *Genet Med.*  
621 2023;25(1):90-102. doi:10.1016/j.gim.2022.09.010
- 622 4. Kenny TC, Khan A, Son Y, et al. Integrative genetic analysis identifies FLVCR1 as a  
623 plasma-membrane choline transporter in mammals. *Cell Metab.* 2023;35(6):1057-1071.e12.  
624 doi:10.1016/j.cmet.2023.04.003
- 625 5. Klepper J, Akman C, Armeno M, et al. Glut1 Deficiency Syndrome (Glut1DS): State of the  
626 art in 2020 and recommendations of the international Glut1DS study group. *Epilepsia Open.*  
627 2020;5(3):354-365. doi:10.1002/epi4.12414
- 628 6. O'Callaghan B, Bosch AM, Houlden H. An update on the genetics, clinical presentation, and  
629 pathomechanisms of human riboflavin transporter deficiency. *J Inherit Metab Dis.*  
630 2019;42(4):598-607. doi:10.1002/jimd.12053
- 631 7. Mathiesen BK, Miyakoshi LM, Cederroth CR, et al. Delivery of gene therapy through a  
632 cerebrospinal fluid conduit to rescue hearing in adult mice. *Sci Transl Med.*  
633 2023;15(702):eabq3916. doi:10.1126/scitranslmed.abq3916
- 634 8. Tailor CS, Willett BJ, Kabat D. A putative cell surface receptor for anemia-inducing feline  
635 leukemia virus subgroup C is a member of a transporter superfamily. *J Virol.*  
636 1999;73(8):6500-6505. doi:10.1128/JVI.73.8.6500-6505.1999



- 637 9. Chiabrando D, Marro S, Mercurio S, et al. The mitochondrial heme exporter FLVCR1b  
638 mediates erythroid differentiation. *J Clin Invest*. 2012;122(12):4569-4579.  
639 doi:10.1172/JCI62422
- 640 10. Quigley JG, Yang Z, Worthington MT, et al. Identification of a human heme exporter that is  
641 essential for erythropoiesis. *Cell*. 2004;118(6):757-766. doi:10.1016/j.cell.2004.08.014
- 642 11. Keel SB, Doty RT, Yang Z, et al. A heme export protein is required for red blood cell  
643 differentiation and iron homeostasis. *Science*. 2008;319(5864):825-828.  
644 doi:10.1126/science.1151133
- 645 12. Ponka P, Sheftel AD, English AM, Scott Bohle D, Garcia-Santos D. Do Mammalian Cells  
646 Really Need to Export and Import Heme? *Trends Biochem Sci*. 2017;42(5):395-406.  
647 doi:10.1016/j.tibs.2017.01.006
- 648 13. Tsuchiya M, Tachibana N, Nagao K, Tamura T, Hamachi I. Organelle-selective click labeling  
649 coupled with flow cytometry allows high-throughput CRISPR screening of genes involved in  
650 phosphatidylcholine metabolism. Published online April 18, 2022:2022.04.18.488621.  
651 doi:10.1101/2022.04.18.488621
- 652 14. Ha HTT, Sukumar VK, Chua JWB, et al. Mfsd7b facilitates choline transport and missense  
653 mutations affect choline transport function. *Cell Mol Life Sci*. 2023;81(1):3.  
654 doi:10.1007/s00018-023-05048-4
- 655 15. Son Y, Kenny TC, Khan A, Birsoy K, Hite RK. Structural basis of lipid head group entry to  
656 the Kennedy pathway by FLVCR1. *BioRxiv Prepr Serv Biol*. Published online September 28,  
657 2023:2023.09.28.560019. doi:10.1101/2023.09.28.560019
- 658 16. Ri K, Weng TH, Cabezudo AC, et al. Structural and mechanistic insights into human choline  
659 and ethanolamine transport. Published online December 19, 2023:2023.09.15.557925.  
660 doi:10.1101/2023.09.15.557925
- 661 17. Da Costa L, Leblanc T, Mohandas N. Diamond-Blackfan anemia. *Blood*.  
662 2020;136(11):1262-1273. doi:10.1182/blood.2019000947
- 663 18. Rey MA, Duffy SP, Brown JK, et al. Enhanced alternative splicing of the FLVCR1 gene in  
664 Diamond Blackfan anemia disrupts FLVCR1 expression and function that are critical for  
665 erythropoiesis. *Haematologica*. 2008;93(11):1617-1626. doi:10.3324/haematol.13359
- 666 19. Rajadhyaksha AM, Elemento O, Puffenberger EG, et al. Mutations in FLVCR1 cause  
667 posterior column ataxia and retinitis pigmentosa. *Am J Hum Genet*. 2010;87(5):643-654.  
668 doi:10.1016/j.ajhg.2010.10.013
- 669 20. Kuehlewein L, Schöls L, Llavona P, et al. Phenotypic spectrum of autosomal recessive  
670 retinitis pigmentosa without posterior column ataxia caused by mutations in the FLVCR1  
671 gene. *Graefes Arch Clin Exp Ophthalmol*. 2019;257(3):629-638. doi:10.1007/s00417-018-  
672 04233-7
- 673 21. Chiabrando D, Castori M, di Rocco M, et al. Mutations in the Heme Exporter FLVCR1  
674 Cause Sensory Neurodegeneration with Loss of Pain Perception. *PLoS Genet*.  
675 2016;12(12):e1006461. doi:10.1371/journal.pgen.1006461

- 676 22. Calame DG, Guo T, Wang C, et al. Monoallelic variation in DHX9, the gene encoding the  
677 DExH-box helicase DHX9, underlies neurodevelopment disorders and Charcot-Marie-Tooth  
678 disease. *Am J Hum Genet.* 2023;110(8):1394-1413. doi:10.1016/j.ajhg.2023.06.013
- 679 23. Sobreira N, Schiettecatte F, Valle D, Hamosh A. GeneMatcher: a matching tool for  
680 connecting investigators with an interest in the same gene. *Hum Mutat.* 2015;36(10):928-  
681 930. doi:10.1002/humu.22844
- 682 24. Wohler E, Martin R, Griffith S, et al. PhenoDB, GeneMatcher and VariantMatcher, tools for  
683 analysis and sharing of sequence data. *Orphanet J Rare Dis.* 2021;16(1):365.  
684 doi:10.1186/s13023-021-01916-z
- 685 25. Coban-Akdemir Z, Song X, Ceballos FC, et al. De novo mutation and identity-by-descent  
686 drive disease haplotypes, biallelic traits and multilocus pathogenic variation. Published  
687 online July 27, 2022:2020.04.27.064824. doi:10.1101/2020.04.27.064824
- 688 26. AlAbdi L, Shamseldin HE, Khouj E, et al. Beyond the exome: utility of long-read whole  
689 genome sequencing in exome-negative autosomal recessive diseases. *Genome Med.*  
690 2023;15(1):114. doi:10.1186/s13073-023-01270-8
- 691 27. Vaughan DP, Costello DJ. Extending the phenotype of posterior column ataxia with retinitis  
692 pigmentosa caused by variants in FLVCR1. *Am J Med Genet A.* 2022;188(4):1259-1262.  
693 doi:10.1002/ajmg.a.62612
- 694 28. Li Z, Li Y, Chu X, et al. Novel mutations in FLVCR1 cause tremors, sensory neuropathy with  
695 retinitis pigmentosa. *Neuropathol Off J Jpn Soc Neuropathol.* Published online July 19,  
696 2023. doi:10.1111/neup.12936
- 697 29. Shaibani A, Wong LJ, Wei Zhang V, Lewis RA, Shinawi M. Autosomal recessive posterior  
698 column ataxia with retinitis pigmentosa caused by novel mutations in the FLVCR1 gene. *Int*  
699 *J Neurosci.* 2015;125(1):43-49. doi:10.3109/00207454.2014.904858
- 700 30. Karczewski KJ, Francioli LC, Tiao G, et al. The mutational constraint spectrum quantified  
701 from variation in 141,456 humans. *Nature.* 2020;581(7809):434-443. doi:10.1038/s41586-  
702 020-2308-7
- 703 31. Brandes N, Goldman G, Wang CH, Ye CJ, Ntranos V. Genome-wide prediction of disease  
704 variant effects with a deep protein language model. *Nat Genet.* 2023;55(9):1512-1522.  
705 doi:10.1038/s41588-023-01465-0
- 706 32. Coban-Akdemir Z, White JJ, Song X, et al. Identifying Genes Whose Mutant Transcripts  
707 Cause Dominant Disease Traits by Potential Gain-of-Function Alleles. *Am J Hum Genet.*  
708 2018;103(2):171-187. doi:10.1016/j.ajhg.2018.06.009
- 709 33. Gao H, Hamp T, Ede J, et al. The landscape of tolerated genetic variation in humans and  
710 primates. *Science.* 2023;380(6648):eabn8153. doi:10.1126/science.abn8197
- 711 34. Suthar R, Sharawat IK, Eggermann K, et al. Hereditary Sensory and Autonomic  
712 Neuropathy: A Case Series of Six Children. *Neurol India.* 2022;70(1):231.  
713 doi:10.4103/0028-3886.338691

- 714 35. Karaca E, Posey JE, Akdemir ZC, et al. Phenotypic expansion illuminates multilocus  
715 pathogenic variation. *Genet Med*. 2018;20(12):1528-1537. doi:10.1038/gim.2018.33
- 716 36. Ha HTT, Sukumar VK, Chua JWB, et al. Mfsd7b facilitates choline uptake and missense  
717 mutations affect choline transport function. Published online September 30,  
718 2023:2023.09.30.560304. doi:10.1101/2023.09.30.560304
- 719 37. Zeisel SH, Klatt KC, Caudill MA. Choline. *Adv Nutr*. 2018;9(1):58-60.  
720 doi:10.1093/advances/nmx004
- 721 38. Vennemann FBC, Ioannidou S, Valsta LM, et al. Dietary intake and food sources of choline  
722 in European populations. *Br J Nutr*. 2015;114(12):2046-2055.  
723 doi:10.1017/S0007114515003700
- 724 39. May T, Caudill M, Manary M. Is There Enough Choline for Children in Food Aid? *JAMA*  
725 *Pediatr*. 2023;177(3):223-224. doi:10.1001/jamapediatrics.2022.5543
- 726 40. Ganz AB, Klatt KC, Caudill MA. Common Genetic Variants Alter Metabolism and Influence  
727 Dietary Choline Requirements. *Nutrients*. 2017;9(8):837. doi:10.3390/nu9080837
- 728 41. Patel D, Witt SN. Ethanolamine and Phosphatidylethanolamine: Partners in Health and  
729 Disease. *Oxid Med Cell Longev*. 2017;2017:4829180. doi:10.1155/2017/4829180
- 730 42. Zeisel SH, Niculescu MD. Perinatal choline influences brain structure and function. *Nutr*  
731 *Rev*. 2006;64(4):197-203. doi:10.1111/j.1753-4887.2006.tb00202.x
- 732 43. Trujillo-Gonzalez I, Friday WB, Munson CA, et al. Low availability of choline in utero disrupts  
733 development and function of the retina. *FASEB J*. 2019;33(8):9194-9209.  
734 doi:10.1096/fj.201900444R
- 735 44. Wang Y, Surzenko N, Friday WB, Zeisel SH. Maternal dietary intake of choline in mice  
736 regulates development of the cerebral cortex in the offspring. *FASEB J*. 2016;30(4):1566-  
737 1578. doi:10.1096/fj.15-282426
- 738 45. Alexander HD, Engel RW. The importance of choline in the prevention of nutritional edema  
739 in rats fed low-protein diets. *J Nutr*. 1952;47(3):361-374. doi:10.1093/jn/47.3.361
- 740 46. Zeisel SH, Da Costa KA, Franklin PD, et al. Choline, an essential nutrient for humans.  
741 *FASEB J Off Publ Fed Am Soc Exp Biol*. 1991;5(7):2093-2098.
- 742 47. May T, de la Haye B, Nord G, et al. One-carbon metabolism in children with marasmus and  
743 kwashiorkor. *EBioMedicine*. 2022;75:103791. doi:10.1016/j.ebiom.2021.103791
- 744 48. Wortmann SB, Mayr JA. Choline-related-inherited metabolic diseases—A mini review. *J*  
745 *Inherit Metab Dis*. 2019;42(2):237-242. doi:10.1002/jimd.12011
- 746 49. Barwick KES, Wright J, Al-Turki S, et al. Defective presynaptic choline transport underlies  
747 hereditary motor neuropathy. *Am J Hum Genet*. 2012;91(6):1103-1107.  
748 doi:10.1016/j.ajhg.2012.09.019

- 749 50. Bauché S, O'Regan S, Azuma Y, et al. Impaired Presynaptic High-Affinity Choline  
750 Transporter Causes a Congenital Myasthenic Syndrome with Episodic Apnea. *Am J Hum*  
751 *Genet.* 2016;99(3):753-761. doi:10.1016/j.ajhg.2016.06.033
- 752 51. Fagerberg CR, Taylor A, Distelmaier F, et al. Choline transporter-like 1 deficiency causes a  
753 new type of childhood-onset neurodegeneration. *Brain J Neurol.* 2020;143(1):94-111.  
754 doi:10.1093/brain/awz376
- 755 52. Nguyen XTA, Le TNU, Ha HTT, et al. MFSD7c functions as a transporter of choline at the  
756 blood-brain barrier. Published online October 3, 2023:2023.10.03.560597.  
757 doi:10.1101/2023.10.03.560597
- 758 53. Meyer E, Ricketts C, Morgan NV, et al. Mutations in FLVCR2 are associated with  
759 proliferative vasculopathy and hydranencephaly-hydrocephaly syndrome (Fowler  
760 syndrome). *Am J Hum Genet.* 2010;86(3):471-478. doi:10.1016/j.ajhg.2010.02.004
- 761 54. Wozniak JR, Fuglestad AJ, Eckerle JK, et al. Choline supplementation in children with fetal  
762 alcohol spectrum disorders: a randomized, double-blind, placebo-controlled trial. *Am J Clin*  
763 *Nutr.* 2015;102(5):1113-1125. doi:10.3945/ajcn.114.099168
- 764 55. Gimbel BA, Anthony ME, Ernst AM, et al. Long-term follow-up of a randomized controlled  
765 trial of choline for neurodevelopment in fetal alcohol spectrum disorder: corpus callosum  
766 white matter microstructure and neurocognitive outcomes. *J Neurodev Disord.*  
767 2022;14(1):59. doi:10.1186/s11689-022-09470-w
- 768 56. Mercurio S, Petrillo S, Chiabrando D, et al. The heme exporter Flvcr1 regulates expansion  
769 and differentiation of committed erythroid progenitors by controlling intracellular heme  
770 accumulation. *Haematologica.* 2015;100(6):720-729. doi:10.3324/haematol.2014.114488
- 771 57. Inoue K, Khajavi M, Ohyama T, et al. Molecular mechanism for distinct neurological  
772 phenotypes conveyed by allelic truncating mutations. *Nat Genet.* 2004;36(4):361-369.  
773 doi:10.1038/ng1322
- 774 58. Neu-Yilik G, Amthor B, Gehring NH, et al. Mechanism of escape from nonsense-mediated  
775 mRNA decay of human  $\beta$ -globin transcripts with nonsense mutations in the first exon. *RNA.*  
776 2011;17(5):843-854. doi:10.1261/rna.2401811
- 777
- 778
- 779
- 780
- 781
- 782
- 783

784

785

786

787

788

789

790

791

792

793

794

**Table 1: Phenotypic summary of individuals with *FLVCR1*-related developmental and neurodegenerative disorders**

|                                         | Family 1          | Family 2          | Family 3                                                                              | Family 4                                                                | Family 5          | Family 6               |                   | Family 7                                            | Family 8              |
|-----------------------------------------|-------------------|-------------------|---------------------------------------------------------------------------------------|-------------------------------------------------------------------------|-------------------|------------------------|-------------------|-----------------------------------------------------|-----------------------|
|                                         | Individual 1      | Individual 2      | Individual 3                                                                          | Individual 4                                                            | Individual 5      | Individual 6           | Individual 7      | Individual 8                                        | Individual 9          |
| <b>Sex, ethnicity</b>                   | M, S. Asia        | M, Middle East    | M, European                                                                           | M, S. Asia                                                              | M, North Africa   | M, Middle East         | M, Middle East    | F, S. Asia                                          | F, European           |
| <b>Age at last exam</b>                 | 6-10 yo           | 0-5 yo            | 6-10 yo                                                                               | 0-5 yo                                                                  | 0-5 yo            | NA                     | 6-10 yo           | 6-10 yo                                             | 0-5 yo                |
| <b>Age at death</b>                     | NA                | 0-5 yo            | NA                                                                                    | 0-5 yo                                                                  | 0-5 yo            | 0-5 yo                 | NA                | NA                                                  | 0-5 yo                |
| <b>Nucleotide</b>                       | c.1390G>A         | c.1328T>G         | c.1169T>G / c.1261G>A                                                                 | c.153_154insC                                                           | c.915T>G          | c.1235G>C <sup>1</sup> | c.1235G>C         | c.1390G>A                                           | c.1019C>T / c.1225T>C |
| <b>Protein</b>                          | p.G464S           | p.L443P           | p.L390* / p.D421N                                                                     | p.A52Rfs*38                                                             | p.S305R           | p.G412A <sup>1</sup>   | p.G412A           | p.G464S                                             | p.T340I / p.S409P     |
| <b>Phenotypic category</b>              | <b>Severe NDD</b> | <b>Severe NDD</b> | <b>Severe NDD</b>                                                                     | <b>Severe NDD</b>                                                       | <b>Severe NDD</b> | <b>Severe NDD</b>      | <b>Severe NDD</b> | <b>Severe NDD</b>                                   | <b>Severe NDD</b>     |
| <b>Microcephaly (Z-score)</b>           | +                 | +                 | +                                                                                     | +                                                                       | +                 | +                      | +                 | +                                                   | +                     |
|                                         | (-2.5)            | (-4.2)            | (-9.0)                                                                                | (-6.5)                                                                  | (-10.5)           |                        | (-5.6)            | (-4.7)                                              | (-2.9)                |
| <b>DD/ID</b>                            | Profound          | Profound          | Profound                                                                              | Profound                                                                | Profound          | Profound               | Profound          | Profound                                            | Profound              |
| <b>Cortical visual impairment</b>       | +                 | -                 | +                                                                                     | +                                                                       | +                 | -                      | -                 | -                                                   | Unk                   |
| <b>Optic disk atrophy</b>               | +                 | +                 | +                                                                                     | +                                                                       | +                 | -                      | -                 | -                                                   | Unk                   |
| <b>Retinitis pigmentosa</b>             | -                 | -                 | +                                                                                     | -                                                                       | -                 | -                      | -                 | +                                                   | Unk                   |
| <b>Hypotonia</b>                        | +                 | +                 | -                                                                                     | +                                                                       | +                 | +                      | +                 | +                                                   | +                     |
| <b>Self-mutilation</b>                  | +                 | -                 | -                                                                                     | -                                                                       | -                 | -                      | -                 | +                                                   | -                     |
| <b>Osteomyelitis</b>                    | +                 | -                 | -                                                                                     | -                                                                       | -                 | -                      | -                 | +                                                   | -                     |
| <b>Sensory neuropathy</b>               | +                 | -                 | -                                                                                     | -                                                                       | -                 | -                      | -                 | +                                                   | Unk                   |
| <b>Motor neuropathy</b>                 | -                 | -                 | -                                                                                     | +                                                                       | -                 | -                      | -                 | -                                                   | Unk                   |
| <b>Scoliosis</b>                        | +                 | -                 | +                                                                                     | -                                                                       | -                 | -                      | -                 | -                                                   | Unk                   |
| <b>Spasticity</b>                       | -                 | +                 | +                                                                                     | -                                                                       | +                 | +                      | +                 | -                                                   | +                     |
| <b>Dystonia</b>                         | -                 | -                 | -                                                                                     | -                                                                       | +                 | -                      | -                 | -                                                   | -                     |
| <b>Epilepsy</b>                         | +                 | +                 | +                                                                                     | -                                                                       | +                 | +                      | +                 | +                                                   | Unk                   |
| <b>Reduced brain volume</b>             | +                 | +                 | +                                                                                     | +                                                                       | +                 | +                      | +                 | +                                                   | +                     |
| <b>Macrocytic anemia</b>                | -                 | -                 | -                                                                                     | +                                                                       | -                 | -                      | -                 | +                                                   | Unk                   |
| <b>Craniofacial malformations</b>       | -                 | -                 | -                                                                                     | -                                                                       | -                 | -                      | -                 | -                                                   | -                     |
| <b>Limb &amp; digital malformations</b> | -                 | -                 | -                                                                                     | +                                                                       | -                 | -                      | -                 | -                                                   | -                     |
| <b>Other clinical features</b>          |                   |                   | Chorea, myoclonus, pain insensitivity, restrictive LD, neurogenic bladder, severe OSA | Thin corpus callosum, hepatomegaly, preaxial polydactyly, recurrent UTI |                   |                        |                   | Complex IV deficiency on muscle RCE, low CSF 5-MTHF | Laryngomalacia        |

**Abbreviations:** NDD, neurodevelopmental disorder; yo, years old; mo, months old; DOL, day of life; DD/ID, developmental delay/intellectual disability; NA, not applicable; ND,

not done; Unk, unknown; LD, lung disease; OSA, obstructive sleep apnea; UTI, urinary tract infections; CSA, central sleep apnea; RCE, respiratory chain enzymes; 5-MTHF – 5-methyltetrahydrofolate; 1,2 – patient DNA not available for genotyping but felt to have same condition.

|                                         | Family 8                            |                                     |                                 | Family 9           |                                 |                          | Family 10                                                      | Family 11                                         | Family 12 |
|-----------------------------------------|-------------------------------------|-------------------------------------|---------------------------------|--------------------|---------------------------------|--------------------------|----------------------------------------------------------------|---------------------------------------------------|-----------|
|                                         | Individual 10                       | Individual 11                       | Individual 12                   | Individual 13      | Individual 14                   | Individual 15            | Individual 16                                                  | Individual 17                                     |           |
| <b>Sex, ethnicity</b>                   | F, European                         | F, European                         | F, Middle East                  | M, Middle East     | M, Middle East                  | F, N. Africa             | F, European                                                    | M, Middle East                                    |           |
| <b>Age at last exam</b>                 | 0-5 yo                              | 0-5 yo                              | NA                              | NA                 | NA                              | 0-5 yo                   | 0-5 yo                                                         | NA                                                |           |
| <b>Age at death</b>                     | 0-5 yo                              | 0-5 yo                              | Stillborn                       | Stillborn          | Stillborn                       | 0-5 yo                   | 0-5 yo                                                         | Neonatal period                                   |           |
| <b>Nucleotide</b>                       | c.1019C>T / c.1225T>C               | c.1019C>T / c.1225T>C               | c.1593+5_1593+8del <sup>2</sup> | c.1593+5_1593+8del | c.1593+5_1593+8del <sup>2</sup> | c.215dupC                | c.1198C>T / c.884-3C>G                                         | c.1089T>G                                         |           |
| <b>Protein</b>                          | p.T340I / p.S409P                   | p.T340I / p.S409P                   | p.? <sup>2</sup>                | p.?                | p.? <sup>2</sup>                | p.E74Rfs*16              | p.Q400* / p.?                                                  | p.Y363*                                           |           |
| <b>Phenotypic category</b>              | <b>Severe NDD</b>                   | <b>Severe NDD</b>                   | <b>Severe NDD</b>               | <b>Severe NDD</b>  | <b>Severe NDD</b>               | <b>Severe NDD</b>        | <b>Severe NDD</b>                                              | <b>Severe NDD</b>                                 |           |
| <b>Microcephaly (Z-score)</b>           | + (-6.0)                            | + (-3.4)                            | +                               | +                  | +                               | + (-3.6)                 | + (-3.9)                                                       | +                                                 |           |
| <b>DD/ID</b>                            | Profound                            | Profound                            | NA                              | NA                 | NA                              | Profound                 | Profound                                                       | NA                                                |           |
| <b>Cortical visual impairment</b>       | +                                   | +                                   | NA                              | NA                 | NA                              | -                        | +                                                              | NA                                                |           |
| <b>Optic disk atrophy</b>               | +                                   | -                                   | NA                              | NA                 | NA                              | +                        | +                                                              | NA                                                |           |
| <b>Retinitis pigmentosa</b>             | Unk                                 | +                                   | NA                              | NA                 | NA                              | -                        | -                                                              | NA                                                |           |
| <b>Hypotonia</b>                        | +                                   | +                                   | NA                              | NA                 | NA                              | +                        | +                                                              | NA                                                |           |
| <b>Self-mutilation</b>                  | -                                   | -                                   | NA                              | NA                 | NA                              | -                        | +                                                              | NA                                                |           |
| <b>Osteomyelitis</b>                    | -                                   | -                                   | NA                              | NA                 | NA                              | -                        | -                                                              | NA                                                |           |
| <b>Sensory neuropathy</b>               | Unk                                 | Unk                                 | NA                              | NA                 | NA                              | +                        | -                                                              | NA                                                |           |
| <b>Motor neuropathy</b>                 | Unk                                 | Unk                                 | NA                              | NA                 | NA                              | +                        | -                                                              | NA                                                |           |
| <b>Scoliosis</b>                        | +                                   | +                                   | NA                              | NA                 | NA                              | -                        | +                                                              | NA                                                |           |
| <b>Spasticity</b>                       | +                                   | +                                   | NA                              | NA                 | NA                              | -                        | -                                                              | NA                                                |           |
| <b>Dystonia</b>                         | +                                   | -                                   | NA                              | NA                 | NA                              | -                        | +                                                              | NA                                                |           |
| <b>Epilepsy</b>                         | +                                   | +                                   | NA                              | NA                 | NA                              | +                        | +                                                              | NA                                                |           |
| <b>Reduced brain volume</b>             | +                                   | +                                   | +                               | +                  | +                               | +                        | +                                                              | +                                                 |           |
| <b>Macrocytic anemia</b>                | +                                   | +                                   | Unk                             | Unk                | Unk                             | -                        | +                                                              | Unk                                               |           |
| <b>Craniofacial malformations</b>       | -                                   | -                                   | +                               | +                  | +                               | -                        | -                                                              | +                                                 |           |
| <b>Limb &amp; digital malformations</b> | -                                   | -                                   | +                               | +                  | +                               | +                        | +                                                              | +                                                 |           |
| <b>Other clinical features</b>          | Laryngomalacia, hypothyroidism, CSA | Laryngomalacia, OSA, hypothyroidism |                                 |                    |                                 | Elevated creatine kinase | B cell lymphopenia, anemia, bifid right thumb, bilateral fixed | Hepato-splenomegaly, cardiomegaly, renal agenesis |           |

medRxiv preprint doi: <https://doi.org/10.1101/2024.02.09.24302464>; this version posted February 13, 2024. The copyright holder for this preprint (which was not certified by peer review) is the author/funder, who has granted medRxiv a license to display the preprint in perpetuity. It is made available under a [CC-BY 4.0 International license](#).

talipes,  
chronic lung  
disease

**Abbreviations:** NDD, neurodevelopmental disorder; yo, years old; mo, months old; DOL, day of life; DD/ID, developmental delay/intellectual disability; NA, not applicable; ND, not done; Unk, unknown; LD, lung disease; OSA, obstructive sleep apnea; UTI, urinary tract infections; CSA, central sleep apnea; RCE, respiratory chain enzymes; 5-MTHF – 5-methyltetrahydrofolate; 1,2 – patient DNA not available for genotyping but felt to have same condition.

|                                         | Family 13      |                | Family 14     | Family 15      | Family 16      | Family 17       |                 | Family 18      | Family 19      |
|-----------------------------------------|----------------|----------------|---------------|----------------|----------------|-----------------|-----------------|----------------|----------------|
|                                         | Individual 18  | Individual 19  | Individual 20 | Individual 21  | Individual 22  | Individual 23   | Individual 24   | Individual 25  | Individual 26  |
| <b>Sex, ethnicity</b>                   | M, Middle East | F, Middle East | F, N. Africa  | M, Middle East | M, Middle East | M, North Africa | M, North Africa | F, Middle East | F, Middle East |
| <b>Age at last exam</b>                 | 6-10 yo        | 0-5 yo         | 11-15 yo      | 11-15 yo       | 41-45 yo       | 6-10 yo         | 6-10 yo         | 31-35 yo       | 0-5 yo         |
| <b>Age at death</b>                     | NA             | NA             | NA            | NA             | NA             | NA              | NA              | NA             | NA             |
| <b>Nucleotide</b>                       | c.1028T>C      | c.1028T>C      | c.1_18del     | c.382T>A       | c.382T>A       | c.757T>G        | c.757T>G        | c.502C>G       | c.574T>C       |
| <b>Protein</b>                          | p.I343T        | p.I343T        | p.M1_D6del    | p.Y128N        | p.Y128N        | p.F253V         | p.F253V         | p.L168V        | p.C192R        |
| <b>Phenotypic category</b>              | Mild           | Mild           | Mild          | Mild           | Mild           | Mild            | Mild            | Mild           | Mild           |
| <b>Microcephaly (Z-score)</b>           | -              | -              | -             | -              | -              | +<br>(-5.5)     | +<br>(-5.6)     | -              | -              |
| <b>DD/ID</b>                            | -              | -              | Mild ID       | -              | -              | Moderate ID     | Severe ID       | -              | Mild DD        |
| <b>Cortical visual impairment</b>       | -              | -              | -             | -              | -              | -               | -               | -              | -              |
| <b>Optic disk atrophy</b>               | -              | -              | -             | -              | -              | -               | -               | -              | -              |
| <b>Retinitis pigmentosa</b>             | -              | -              | +             | +              | +              | -               | -               | +              | -              |
| <b>Hypotonia</b>                        | -              | -              | +             | -              | +              | +               | +               | -              | +              |
| <b>Self-mutilation</b>                  | -              | -              | +             | -              | -              | -               | -               | -              | +              |
| <b>Osteomyelitis</b>                    | -              | -              | +             | -              | -              | -               | -               | -              | -              |
| <b>Sensory neuropathy</b>               | +              | +              | +             | +              | -              | -               | -               | +              | +              |
| <b>Motor neuropathy</b>                 | -              | -              | +             | +              | +              | -               | -               | -              | -              |
| <b>Scoliosis</b>                        | -              | -              | -             | -              | +              | -               | +               | -              | -              |
| <b>Spasticity</b>                       | -              | -              | -             | -              | +              | -               | -               | -              | -              |
| <b>Dystonia</b>                         | -              | -              | -             | +              | -              | -               | -               | -              | -              |
| <b>Epilepsy</b>                         | -              | -              | -             | -              | -              | -               | +               | -              | -              |
| <b>Reduced brain volume</b>             | ND             | ND             | -             | ND             | ND             | +               | +               | ND             | ND             |
| <b>Macrocytic anemia</b>                | -              | -              | -             | -              | -              | -               | -               | -              | -              |
| <b>Craniofacial malformations</b>       | -              | -              | -             | -              | -              | -               | -               | -              | -              |
| <b>Limb &amp; digital malformations</b> | -              | -              | -             | -              | -              | -               | -               | -              | -              |
| <b>Other clinical</b>                   |                |                |               |                | Progressive    | Dysmorphic      | Dysmorphic      |                |                |



|                                                                                                                                                                                                                                                                                                                                                                                                                                                                                            |  |  |  |  |                                     |                           |                                           |  |  |
|--------------------------------------------------------------------------------------------------------------------------------------------------------------------------------------------------------------------------------------------------------------------------------------------------------------------------------------------------------------------------------------------------------------------------------------------------------------------------------------------|--|--|--|--|-------------------------------------|---------------------------|-------------------------------------------|--|--|
| <b>features</b>                                                                                                                                                                                                                                                                                                                                                                                                                                                                            |  |  |  |  | spastic paraplegia, childhood onset | facies, autistic features | facies, autistic features, cryptorchidism |  |  |
| <b>Abbreviations:</b> NDD, neurodevelopmental disorder; yo, years old; mo, months old; DOL, day of life; DD/ID, developmental delay/intellectual disability; NA, not applicable; NR, not reported; ND, not done; Unk, unknown; LD, lung disease; OSA, obstructive sleep apnea; UTI, urinary tract infections; CSA, central sleep apnea; RCE, respiratory chain enzymes; 5-MTHF – 5-methyltetrahydrofolate; 1,2 – patient DNA not available for genotyping but felt to have same condition. |  |  |  |  |                                     |                           |                                           |  |  |

|                                                                                                                                                                      | <b>Family 20<br/>Individual 27</b> | <b>Severe NDD<br/>summary</b> |
|----------------------------------------------------------------------------------------------------------------------------------------------------------------------|------------------------------------|-------------------------------|
| <b>Sex, ethnicity</b>                                                                                                                                                | F, Middle East                     |                               |
| <b>Age at last exam</b>                                                                                                                                              | 66-70 yo                           |                               |
| <b>Age at death</b>                                                                                                                                                  | NA                                 | <b>13/17</b>                  |
| <b>Nucleotide</b>                                                                                                                                                    | c.1028T>C                          |                               |
| <b>Protein</b>                                                                                                                                                       | p.I343T                            |                               |
| <b>Phenotypic category</b>                                                                                                                                           | Mild                               |                               |
| <b>Microcephaly (Z-score)</b>                                                                                                                                        | -                                  | <b>17/17</b>                  |
| <b>DD/ID</b>                                                                                                                                                         | -                                  | <b>13/13</b>                  |
| <b>Cortical visual impairment</b>                                                                                                                                    | -                                  | <b>7/12</b>                   |
| <b>Optic disk atrophy</b>                                                                                                                                            | -                                  | <b>8/12</b>                   |
| <b>Retinitis pigmentosa</b>                                                                                                                                          | +                                  | <b>3/12</b>                   |
| <b>Hypotonia</b>                                                                                                                                                     | -                                  | <b>12/13</b>                  |
| <b>Self-mutilation</b>                                                                                                                                               | -                                  | <b>3/12</b>                   |
| <b>Osteomyelitis</b>                                                                                                                                                 | -                                  | <b>2/12</b>                   |
| <b>Sensory neuropathy</b>                                                                                                                                            | -                                  | <b>3/10</b>                   |
| <b>Motor neuropathy</b>                                                                                                                                              | -                                  | <b>2/10</b>                   |
| <b>Scoliosis</b>                                                                                                                                                     | -                                  | <b>5/12</b>                   |
| <b>Spasticity</b>                                                                                                                                                    | -                                  | <b>8/13</b>                   |
| <b>Dystonia</b>                                                                                                                                                      | +                                  | <b>3/13</b>                   |
| <b>Epilepsy</b>                                                                                                                                                      | -                                  | <b>11/12</b>                  |
| <b>Reduced brain volume</b>                                                                                                                                          | -                                  | <b>17/17</b>                  |
| <b>Macrocytic anemia</b>                                                                                                                                             | -                                  | <b>5/12</b>                   |
| <b>Craniofacial malformations</b>                                                                                                                                    | -                                  | <b>4/17</b>                   |
| <b>Limb &amp; digital malformations</b>                                                                                                                              | -                                  | <b>7/17</b>                   |
| <b>Other clinical features</b>                                                                                                                                       |                                    |                               |
| <b>Abbreviations:</b> NDD, neurodevelopmental disorder; yo, years old; mo, months old; DOL, day of life; DD/ID, developmental delay/intellectual disability; NA, not |                                    |                               |

applicable; ND, not done; Unk, unknown; LD, lung disease; OSA, obstructive sleep apnea; UTI, urinary tract infections; CSA, central sleep apnea; RCE, respiratory chain enzymes; 5-MTHF – 5-methyltetrahydrofolate; 1,2 – patient DNA not available for genotyping but felt to have same condition.

**Table 2: Summary of *FLVCR1* variant alleles**

| Individual(s)                                   | Phenotype | Zygoty  | Position (hg19)                     | Nucleotide / Protein         | Allele count / frequency (gnomAD) | CADD  | REVEL | phyloP100 way | SpliceAI                                            |
|-------------------------------------------------|-----------|---------|-------------------------------------|------------------------------|-----------------------------------|-------|-------|---------------|-----------------------------------------------------|
| F1, I-1; F7, I-8                                | Severe    | Hmz     | 1-213061913-G-A                     | c.1390G>A<br>p.G464S         | 1 htz<br>1 in 251,426             | 33    | 0.742 | 9.242         | 0.17 (donor gain),<br>0.23 (donor loss)             |
| F2, I-2                                         | Severe    | Hmz     | 1-213061851-T-G                     | c.1328T>G<br>p.L443P         | 0                                 | 31    | 0.757 | 7.546         | 0.11 (donor gain)                                   |
| F3, I-3                                         | Severe    | Cmp htz | 1-213058711-T-G                     | c.1169T>G<br>p.L390*         | 0                                 | 37    | -     | 7.546         | 0                                                   |
|                                                 | Severe    | Cmp htz | 1-213061297-G-A                     | c.1261G>A<br>p.D421N         | 0                                 | 16.72 | 0.087 | -0.223        | 0.22 (donor loss)                                   |
| F4, I-4                                         | Severe    | Hmz     | 1-213031948--C                      | c.153_154insC<br>p.A52Rfs*38 | 0                                 | -     | -     | 5.239         | -                                                   |
| F5, I-5                                         | Severe    | Hmz     | 1-213046051-T-G                     | c.915T>G<br>p.S305R          | 0                                 | 23.1  | 0.486 | 0.23          | 0                                                   |
| F6, I-7                                         | Severe    | Hmz     | 1-213061271-G-C                     | c.1235G>C<br>p.G412A         | 2 htz<br>1 in 125,477             | 29.8  | 0.435 | 4.104         | 0.11 (acceptor<br>gain), 0.28<br>(acceptor loss)    |
| F8, I-9, I-10, I-11                             | Severe    | Cmp htz | 1-213046155-C-T                     | c.1019C>T<br>p.T340I         | 2 htz<br>1 in 125,435             | 22.5  | 0.281 | 0.814         | 0                                                   |
|                                                 | Severe    | Cmp htz | 1-213061261-T-C                     | c.1225C>T<br>p.S409P         | 0                                 | 29.5  | 0.624 | 5.727         | 0.19 (acceptor<br>gain)                             |
| F9, I-12 <sup>a</sup> , I-13, I-14 <sup>a</sup> | Severe    | Hmz     | 1-213068396-GTAA-                   | c.1593+5_1593+8del,<br>p.?   | 9 htz<br>1 in 27,874              | -     | -     | 7.236         | 0.97 (donor loss)                                   |
| F10, I-15                                       | Severe    | Hmz     | 1-213032009--C                      | c.215dupC,<br>p.E74Rfs*16    | 0                                 | -     | -     | 5.549         | -                                                   |
| F11, I-16                                       | Severe    | Cmp htz | 1-213061234-C-T                     | c.1198C>T<br>p.Q400*         | 0                                 | 47    | -     | 3.853         | 0                                                   |
|                                                 |           | Cmp htz | 1-213046017-C-G                     | c.884-3C>G<br>p.?            | 0                                 | 17.84 | -     | 0.123         | 0.43 (acceptor<br>loss),<br>0.09 (acceptor<br>gain) |
| F12, I-7                                        | Severe    | Hmz     | 1-213056777-T-G                     | c.1089T>G<br>p.Y363*         | 0                                 | 34    | -     | 0.449         | 0.02 (donor loss)                                   |
| F13, I-18, I-19; F20, I-27                      | Mild      | Hmz     | 1-213056716-T-C                     | c.1028T>C<br>p.I343T         | 1 htz<br>1 in 242,226             | 26.9  | 0.525 | 6.637         | 0                                                   |
| F14, I-20                                       | Mild      | Hmz     | 1-213031792-<br>GATATGGCGCGGCCAGAC- | c.1_18del<br>p.?             | 0                                 | -     | -     | 3.118         | -                                                   |
| F15, I-21; F16, I-22                            | Mild      | Hmz     | 1-213032176-T-A                     | c.382T>A<br>p.Y128N          | 0                                 | 32    | 0.723 | 7.629         | 0                                                   |
| F17, I-23, I-24                                 | Mild      | Hmz     | 1-213037085-T-G                     | c.757T>G<br>p.F253V          | 0                                 | 29.8  | 0.718 | 7.806         | 0                                                   |
| F18, I-25                                       | Mild      | Hmz     | 1-213032296-C-G                     | c.502C>G<br>p.L168V          | 0                                 | 26.0  | 0.34  | 3.743         | 0                                                   |
| F19, I-26                                       | Mild      | Hmz     | 1-213032368-T-C                     | c.574T>C<br>p.C192R          | 5 htz<br>1 in 50,112              | 29.3  | 0.895 | 1.93          | 0                                                   |

Abbreviations: CADD, Combined Annotation Dependent Depletion GRCh37-v1.6; gnomAD, Genome Aggregation Database v2.1.1; hmz, homozygote; cmp htz, compound heterozygote; REVEL, rare exome variant ensemble learner; a – patient DNA not available for genotyping but felt to have same condition.





Fig. 2

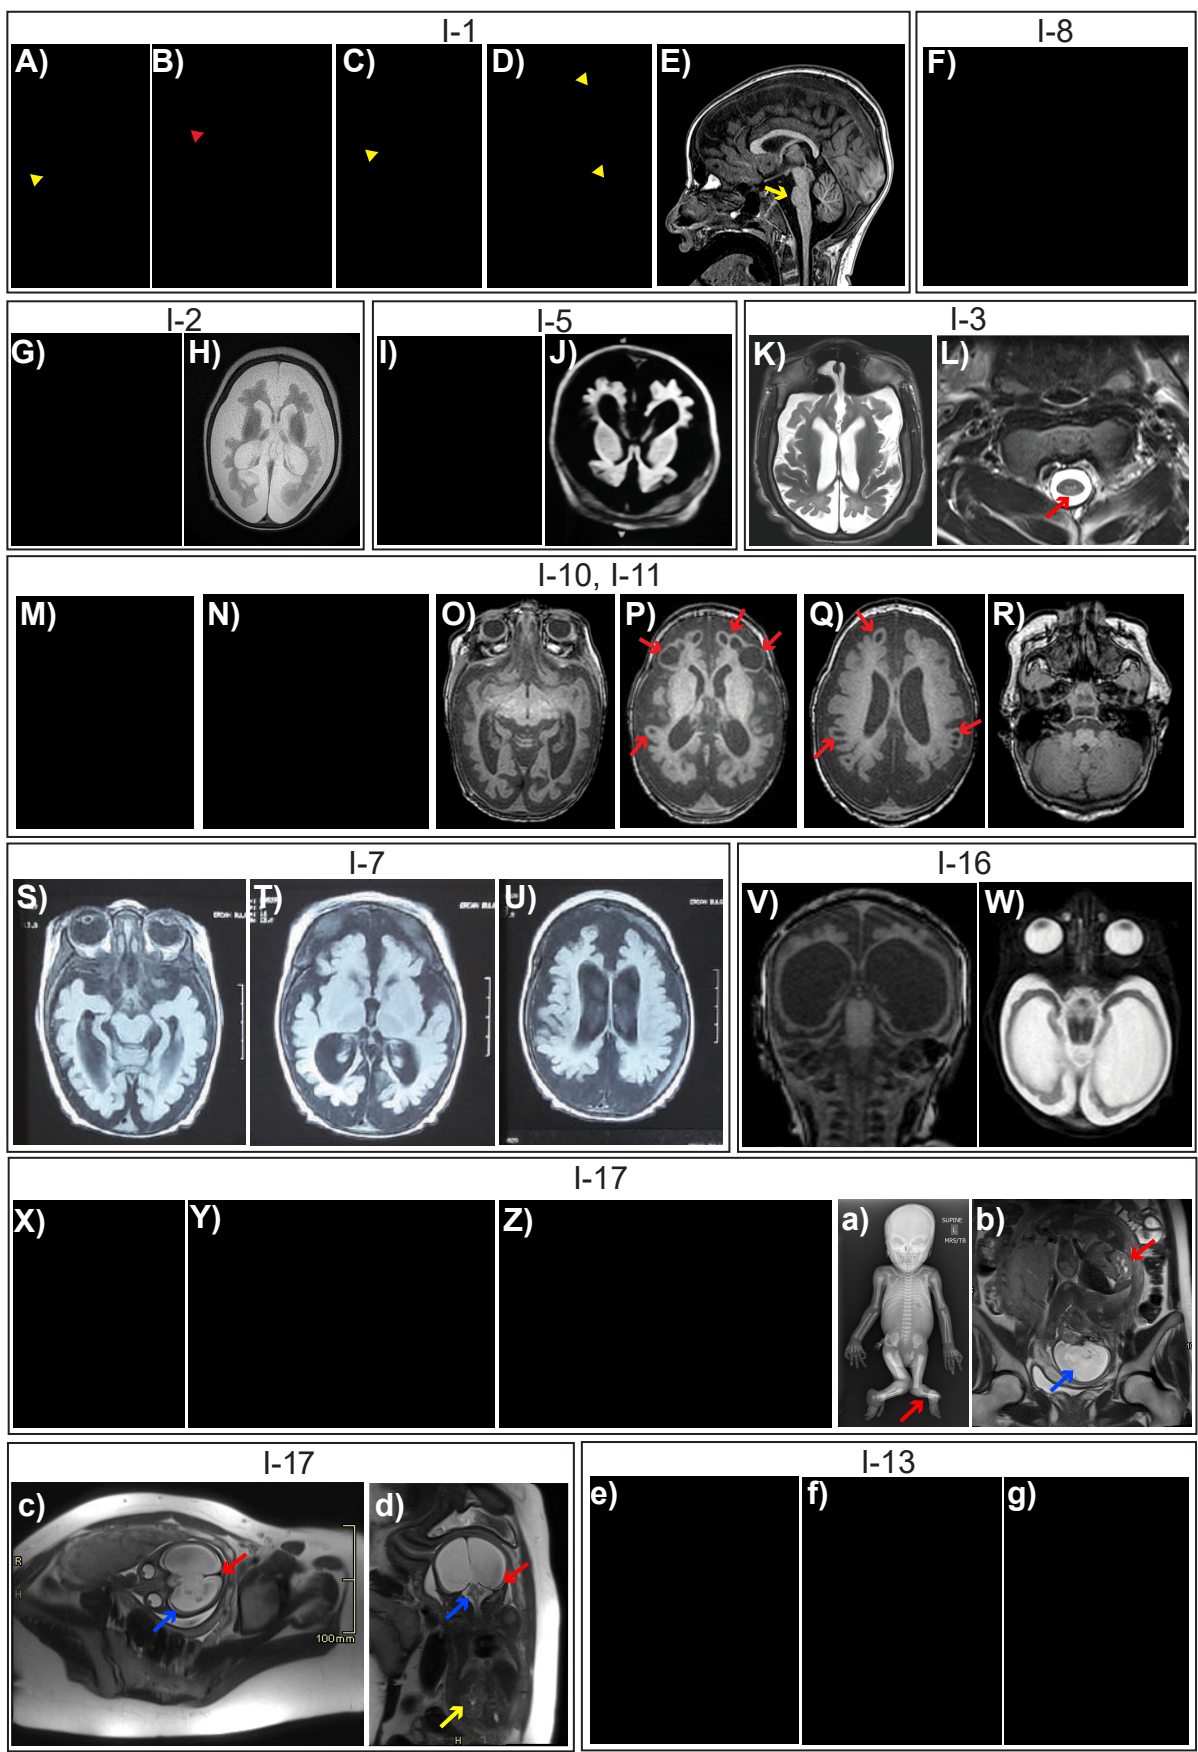

**A) FLVCR1 cDNA NM\_014053.4**

Fig. 3

**Start loss variants**

c.2T>C, c.1\_18del  
c.3G>T

**Splice variants**

c.883+6T>C  
c.884-3C>G

c.1092+5G>A

c.1593+5\_1593+8del

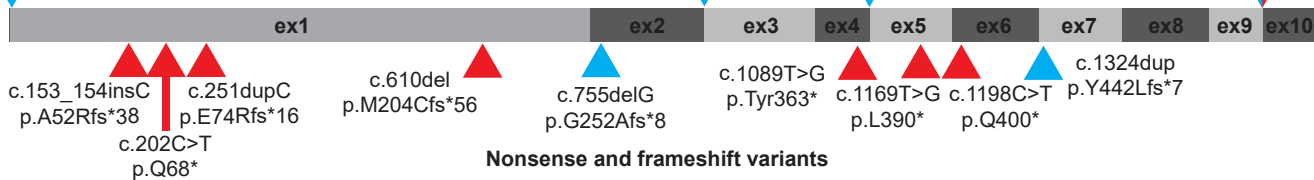

**B)**

**ESM1b FLVCR1 predictions**

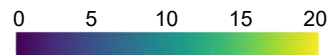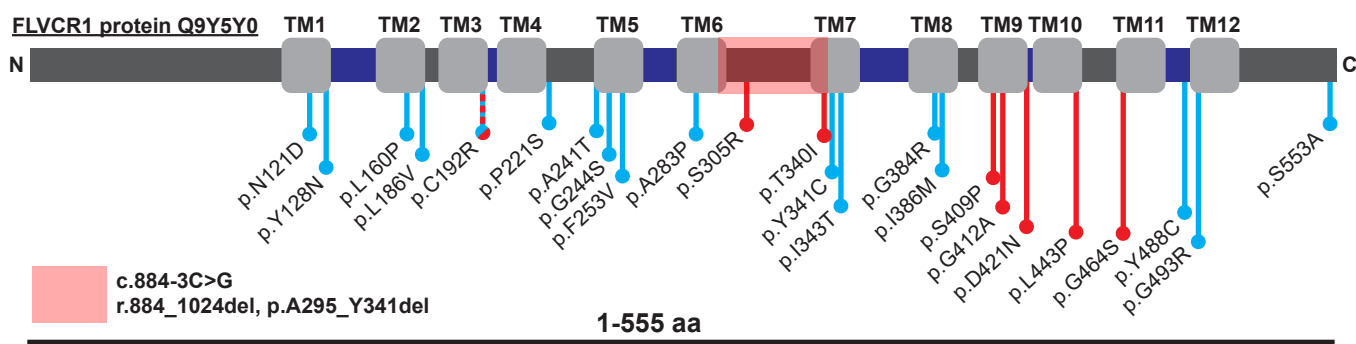

**C)**

**CADD REVEL MetaRNN phyloP100way GERP**

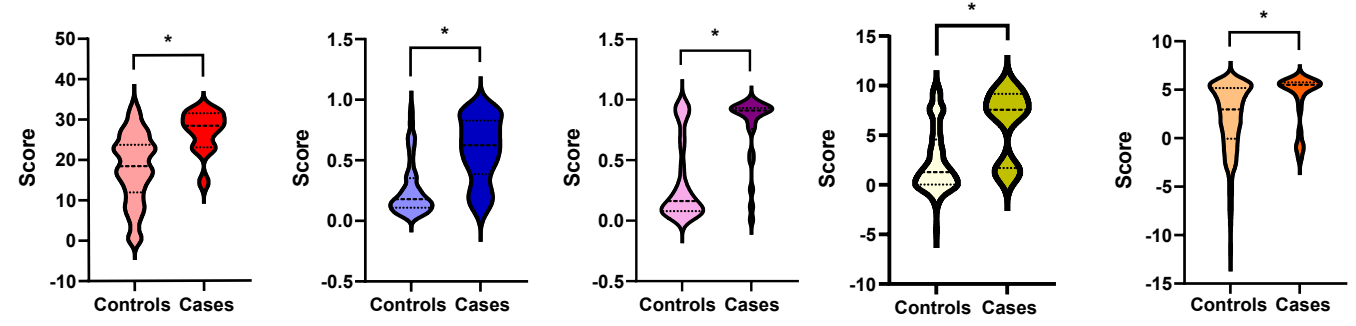

**D)**

**CADD REVEL GERP TM 9-11 clustering Isoform clustering**

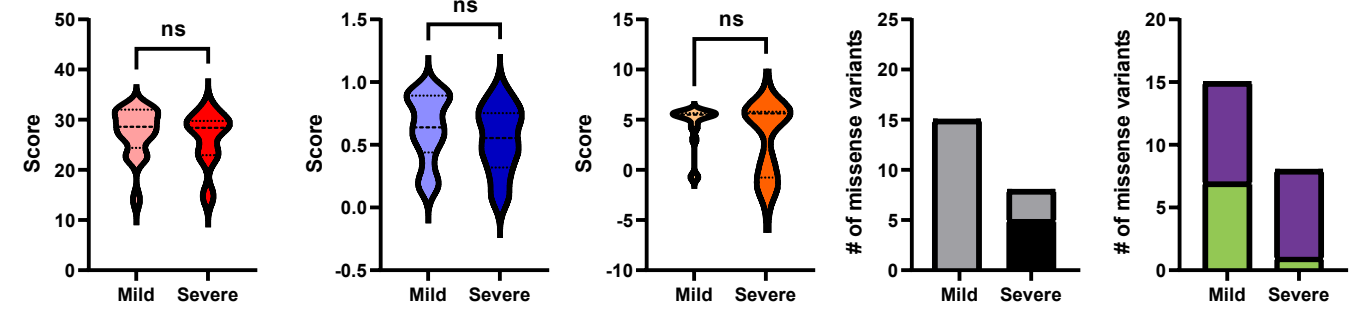



Fig. 4

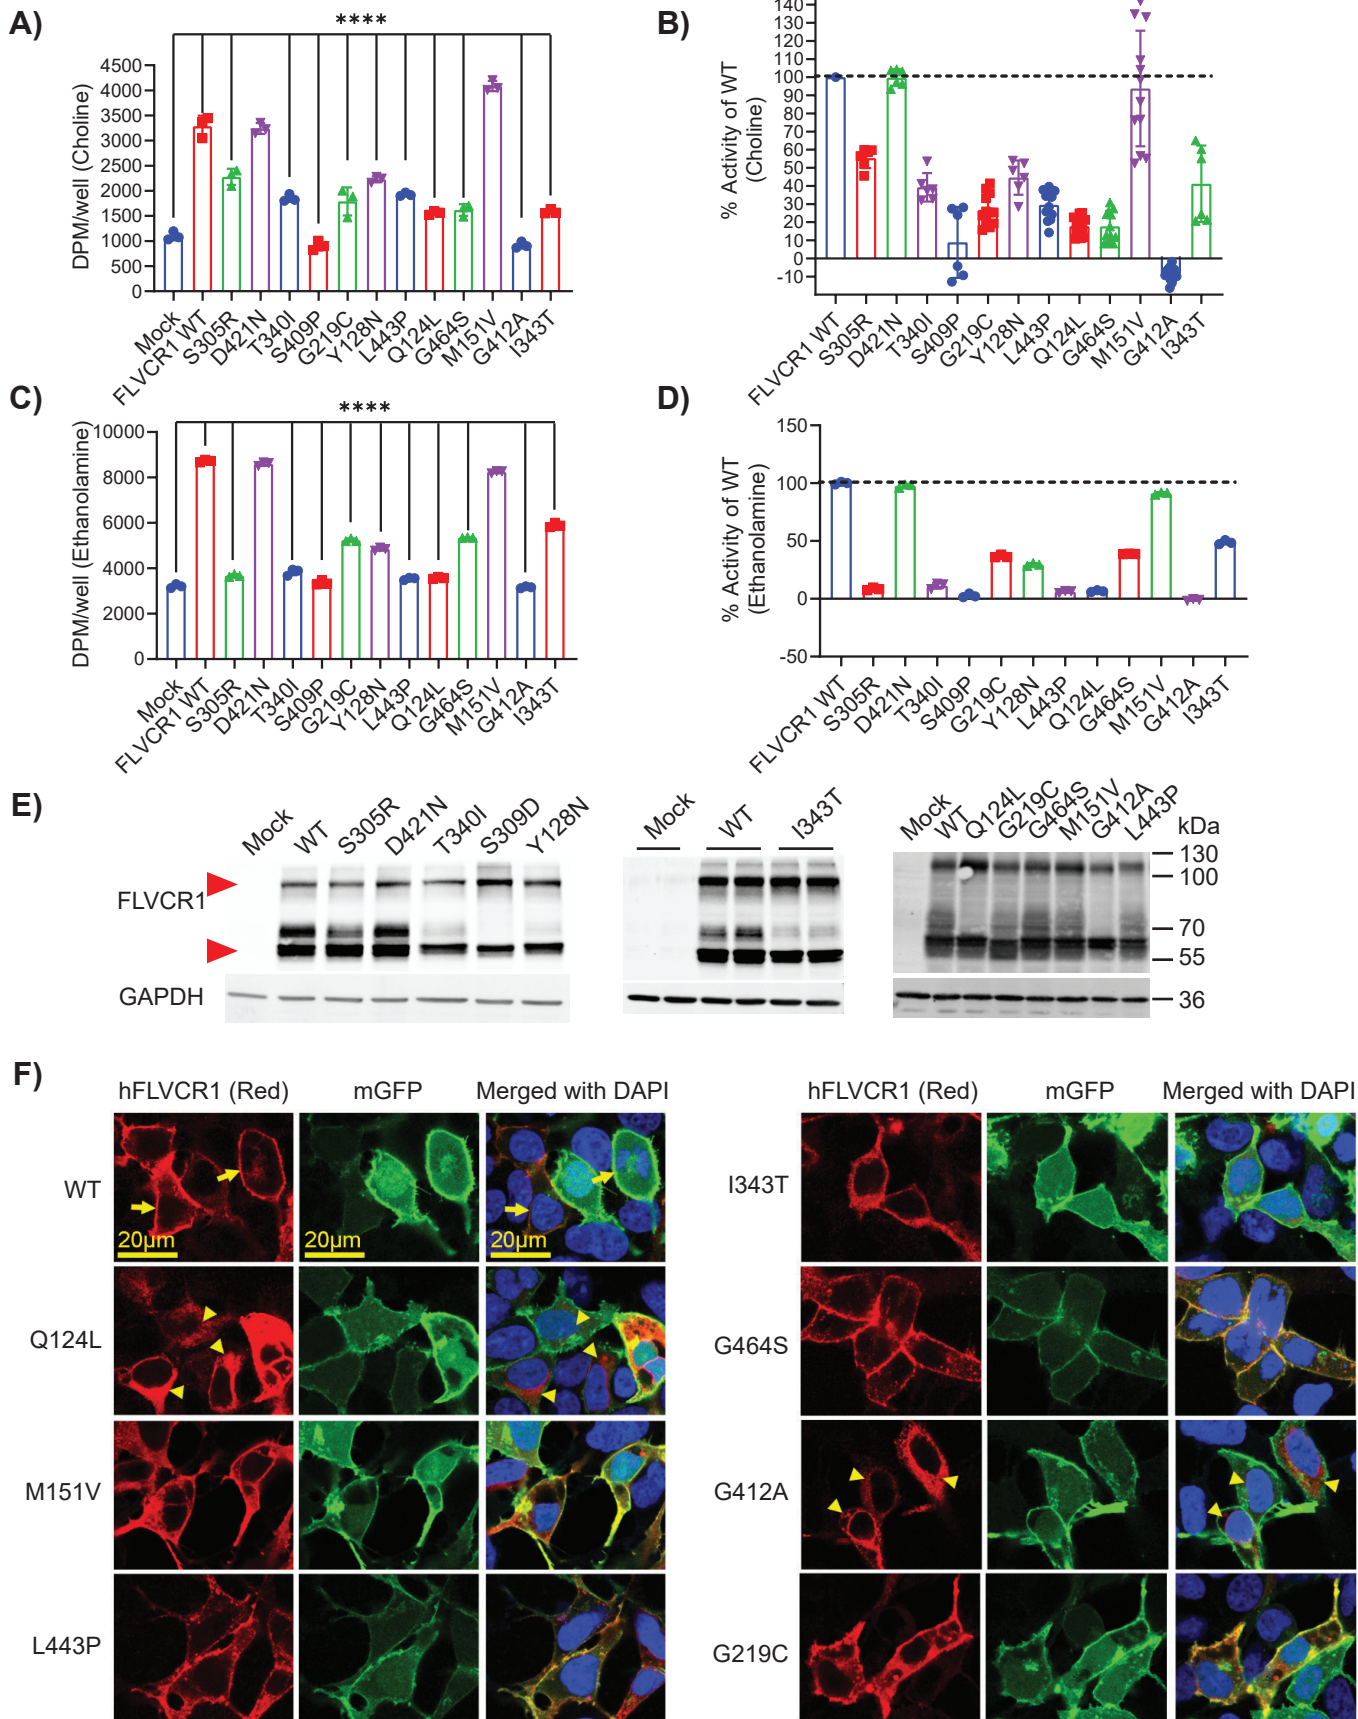

Source: https://medrxiv.org/content/10.1101/2024.02.09.24302464v1.full.pdf
